# Supplementary material for: Comparative phase I randomized open-label pilot clinical trial of Gynophilus® (Lcr regenerans®) immediate release capsules versus slow release muco-adhesive tablets
Source: PubMed Central journal article supplement (PMC6154122; doi:10.1007/s10096-018-3321-8), 2018-07-21
Supplement: 10096_2018_3321_MOESM3_ESM.pdf [file 10096_2018_3321_MOESM3_ESM.pdf]

# Comparative phase I randomized open-label pilot clinical trial of Gynophilus<sup>®</sup> (Lcr regenerans<sup>®</sup>) Immediate Release capsules versus Slow Release muco-adhesive tablets.

European Journal of Clinical Microbiology & Infectious Diseases

Caroline DAUSSET<sup>a#</sup>, Stéphane PATRIER<sup>a</sup>, Pawel GAJER<sup>b</sup>, Claudia THORAL<sup>a</sup>, Yann LENGLET<sup>c</sup>, Jean-Michel CARDOT<sup>d</sup>, Philippe JUDLIN<sup>e</sup>, Jacques RAVEL<sup>b</sup>, Adrien NIVOLIEZ<sup>a</sup>

<sup>a</sup> Research and development department, BIOSE, Aurillac, France

<sup>b</sup> Institute for Genome Sciences, University of Maryland School of Medicine, Baltimore, Maryland, USA

<sup>c</sup> Gynecology and obstetrics department, Jacques Lacarin Hospital Center, Vichy, France

<sup>d</sup> Biopharmaceutical Department, UMR MEDIS, Faculty of Pharmacy, University of Clermont Auvergne, Clermont-Ferrand, France

<sup>e</sup> Gynecology and Obstetrics Department, Nancy University Hospital, Nancy, France

# Corresponding author, [c.dausset@biose.com](mailto:c.dausset@biose.com)

**Online Resource 3:** Representative longitudinal vaginal microbiota profiles of women enrolled in each of the treatment arms ((a) treatment 1; (b) treatment 2; (c) treatment 3; (d) reference treatment). *Lactobacillus casei* (pink) indicates the live biotherapeutic microorganism Lcr35<sup>®</sup>. Vertically, each column represents one sampling day. Horizontally, community state type (CST) distribution for all samples collected by women was determined by the abundance of phylotype composition represented in the taxa relative abundance histogram. CST reflect the dominant microorganisms, CST-I is dominated by *L. crispatus*, CST-II by *L. gasseri*, CST-III by *L. iners*, CST-V by *L. jensenii*, CST-VI by *L. casei* (Lcr35<sup>®</sup>) and CST-IV is characterized by a diverse set of strict and facultative anaerobes.

# Subject 001-001 REF (1 caps/day)

CSTs

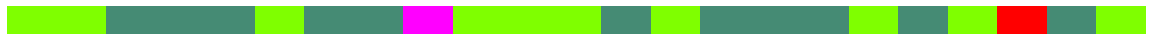

- Phylotype**
- *Lactobacillus gasseri*
  - *Lactobacillus casei (Lcr35)*
  - *Escherichia coli*
  - *Atopobium vaginae*
  - *Lactobacillus coleohominis*
  - *Lactobacillus crispatus*
  - *Lactobacillus vaginalis*
  - *Enterococcus faecalis*
  - Other
  - *Raoultella planticola*
  - *g Streptococcus*
  - *Lactobacillus fermentum*
  - *Gardnerella vaginalis*
  - *Prevotella genogroup 2*
  - *Lactobacillus jensenii*

Taxa relative abundance

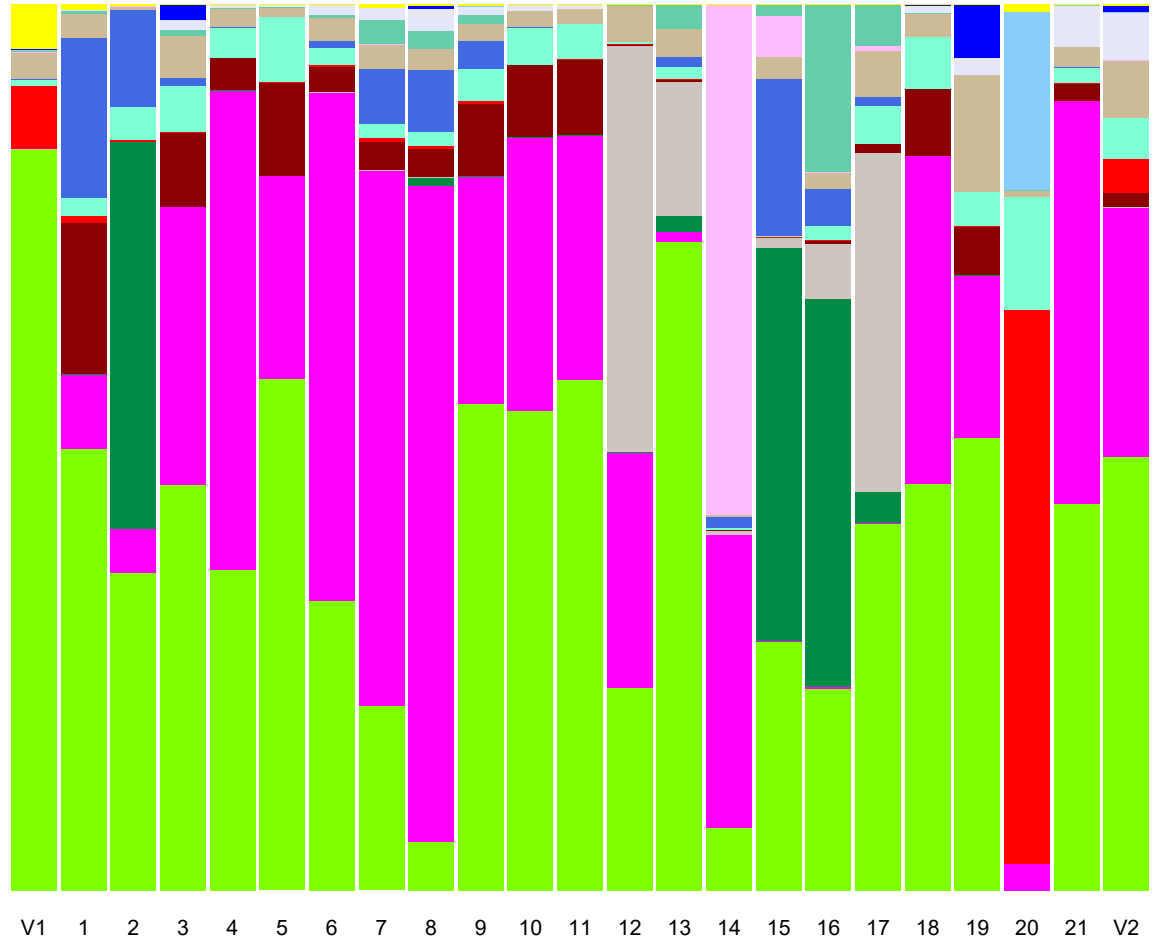

Time (days in the study)

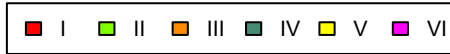

# Subject 001-003 TRT2 (1 tab/4 days)

CSTs

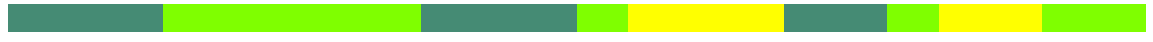

- Phylotype*
- *Lactobacillus gasseri*
  - *Atopobium vaginae*
  - *Lactobacillus jensenii*
  - *Lactobacillus iners*
  - *Lactobacillus casei (Lcr35)*
  - *Escherichia coli*
  - *Ureaplasma parvum*
  - *Other*
  - *Raoultella planticola*
  - *g Pseudomonas*
  - *Enterococcus faecalis*
  - *Prevotella bivia*
  - *Lactobacillus mucosae*
  - *g Streptococcus*
  - *Aerococcus viridans*
  - *Acinetobacter baumannii*

Taxa relative abundance

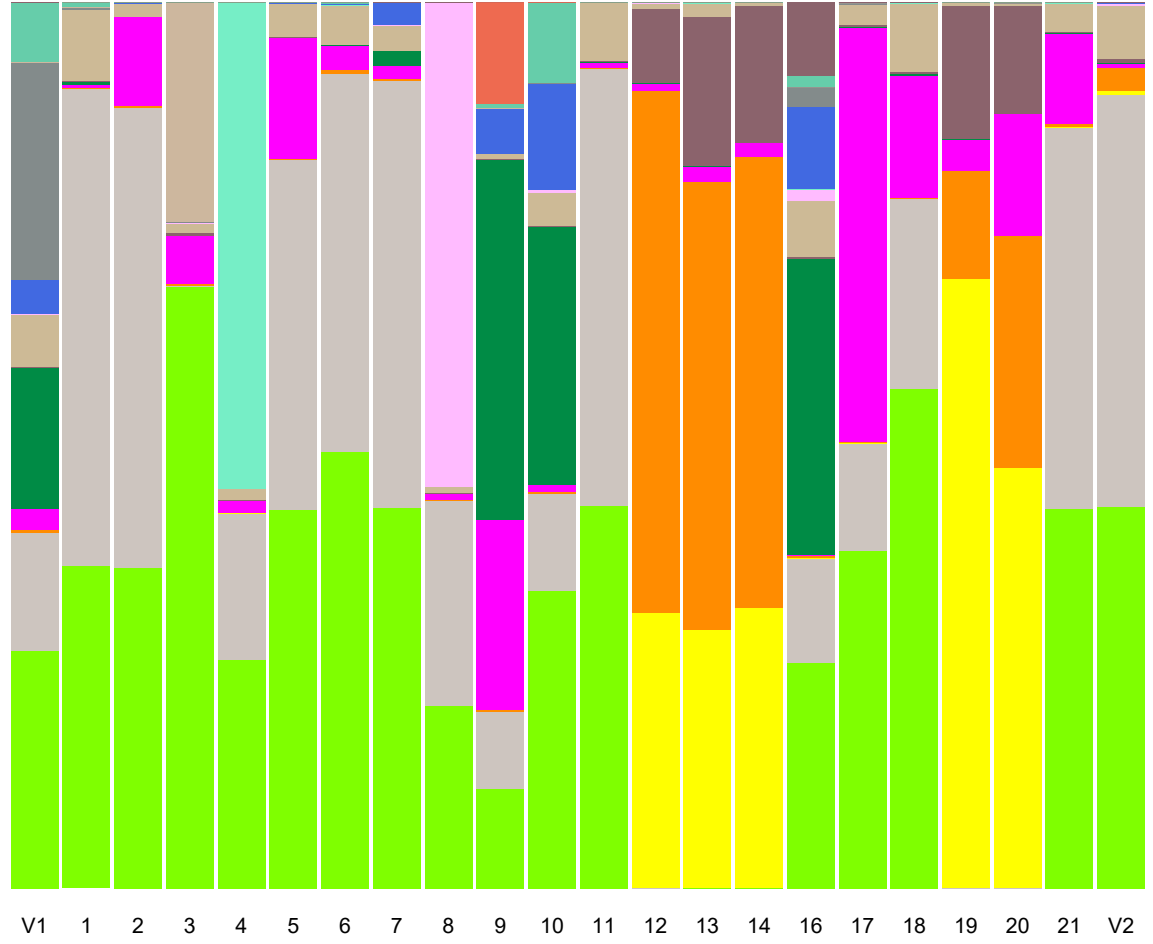

Time (days in the study)

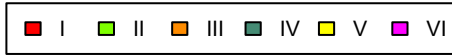

# Subject 001-004 TRT1 (1 tab/3 days)

CSTs

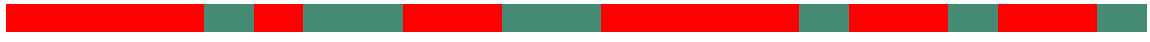

- Phylotype**
- *Lactobacillus crispatus*
  - *Lactobacillus casei* (Lcr35)
  - *Raoultella planticola*
  - *g Staphylococcus*
  - *Lactobacillus iners*
  - *Corynebacterium accolens*
  - Other
  - *Enterococcus faecalis*
  - *Escherichia coli*
  - *g Pseudomonas*
  - *Acinetobacter baumannii*
  - *Lactobacillus vaginalis*

Taxa relative abundance

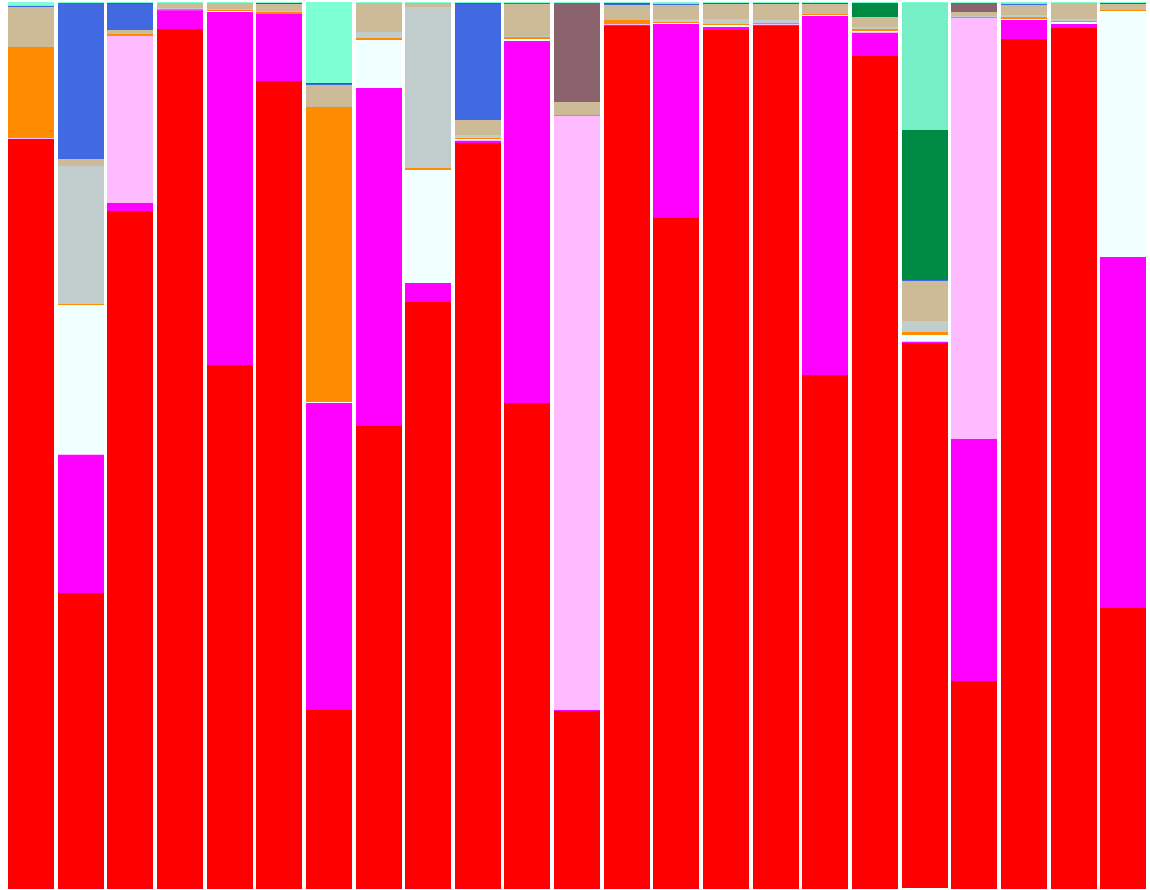

V1 1 2 3 4 5 6 7 8 9 10 11 12 13 14 15 16 17 18 19 20 21 V2

Time (days in the study)

- I ■ II ■ III ■ IV ■ V ■ VI

# Subject 001-005 REF (1 caps/day)

CSTs

- Phylotype
- *Lactobacillus crispatus*
  - *Lactobacillus casei (Lcr35)*
  - *Lactobacillus vaginalis*
  - *Lactobacillus iners*
  - *Enterococcus faecalis*
  - *Gardnerella vaginalis*
  - Other
  - *Raoultella planticola*
  - g *Staphylococcus*
  - *Escherichia coli*
  - *Lactobacillus gasseri*

Taxa relative abundance

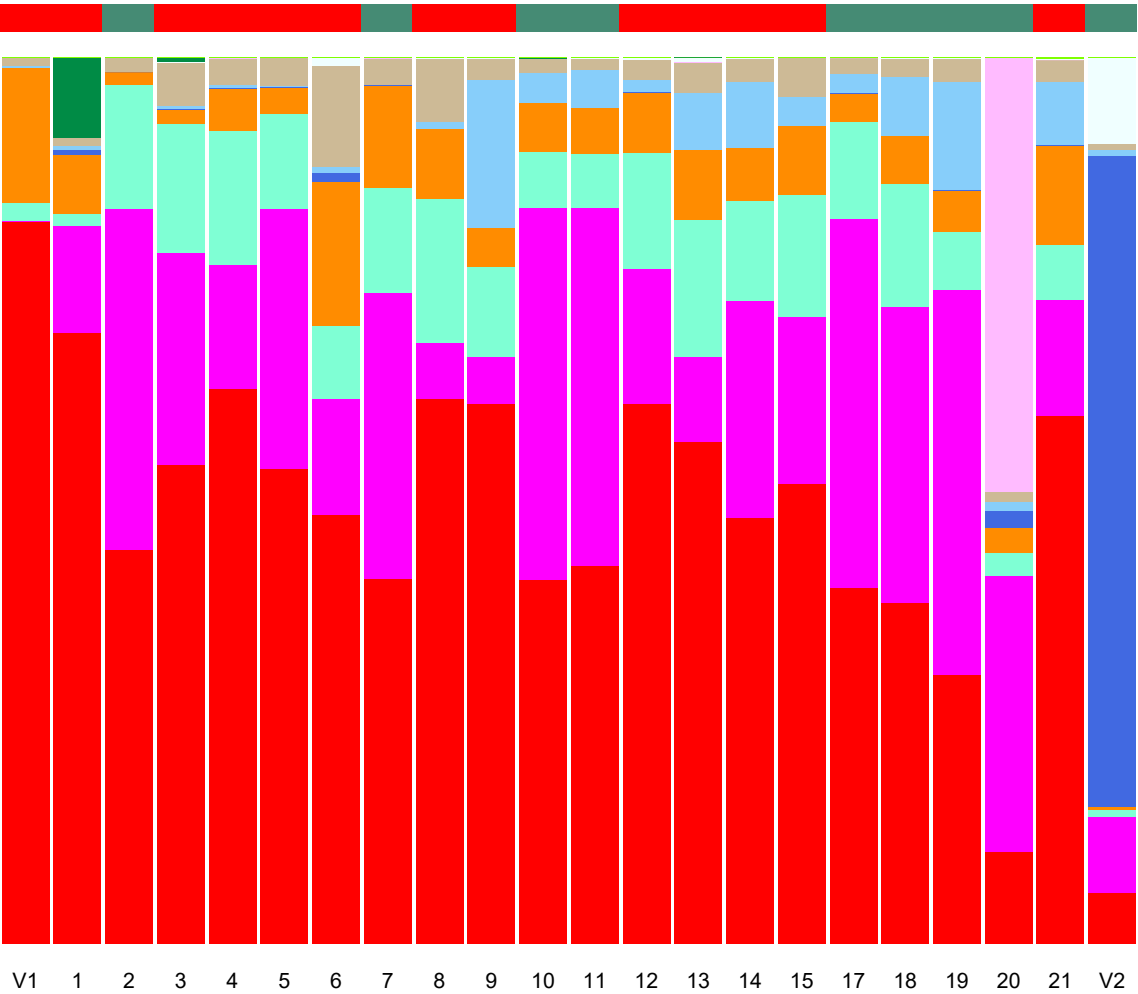

Time (days in the study)

- |                                      |                                             |                                           |                                        |                                         |                                           |
|--------------------------------------|---------------------------------------------|-------------------------------------------|----------------------------------------|-----------------------------------------|-------------------------------------------|
| <span style="color: red;">■</span> I | <span style="color: limegreen;">■</span> II | <span style="color: orange;">■</span> III | <span style="color: grey;">■</span> IV | <span style="color: yellow;">■</span> V | <span style="color: magenta;">■</span> VI |
|--------------------------------------|---------------------------------------------|-------------------------------------------|----------------------------------------|-----------------------------------------|-------------------------------------------|

# Subject 001-006 TRT3 (1 tab/5 days)

CSTs

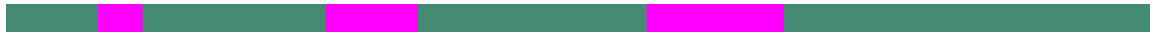

- Phylotype**
- *Lactobacillus casei* (Lcr35)
  - g *Streptococcus*
  - *Escherichia coli*
  - *Prevotella bivia*
  - Other
  - *Alloscardovia omnicolens*
  - *Corynebacterium accolens*
  - *Ureaplasma parvum*
  - *Enterococcus faecalis*
  - *Lactobacillus iners*
  - *Finnegoldia magna*
  - *Bifidobacterium bifidum*

Taxa relative abundance

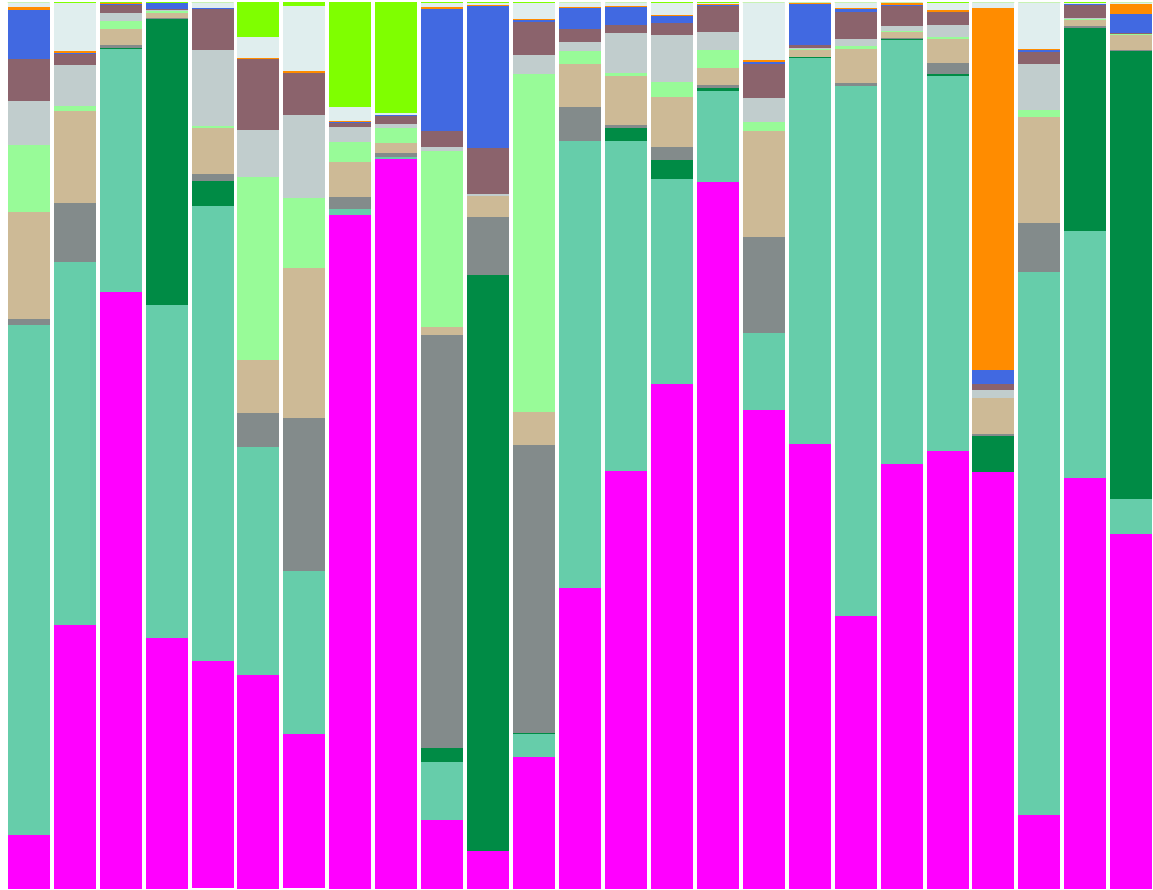

V1 1 2 3 4 5 6 7 8 9 10 11 12 13 14 15 16 17 18 19 20 21 22 23 V2

Time (days in the study)

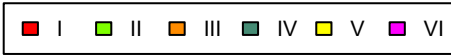

# Subject 001-007 TRT2 (1 tab/4 days)

CSTs

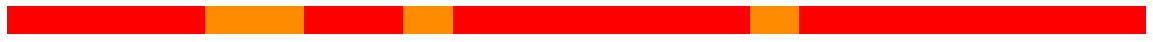

- Phylotype**
- *Lactobacillus crispatus*
  - *Lactobacillus iners*
  - *Lactobacillus vaginalis*
  - *Lactobacillus casei* (Lcr35)
  - *Gardnerella vaginalis*
  - Other
  - *Lactobacillus jensenii*
  - *Lactobacillus gasseri*
  - *Enterococcus faecalis*
  - g *Streptococcus*
  - *Escherichia coli*

Taxa relative abundance

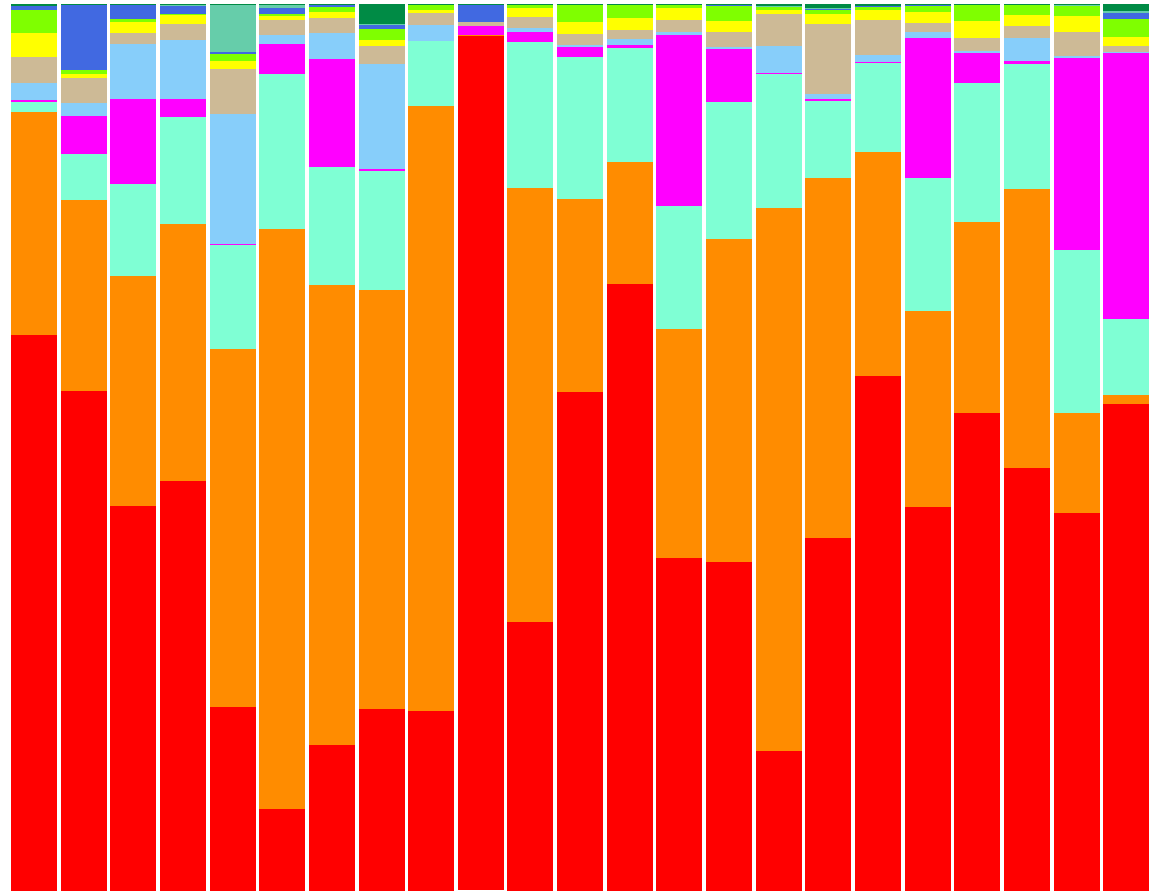

V1 1 2 3 4 5 6 7 8 9 10 11 12 13 14 15 16 17 18 19 20 21 V2

Time (days in the study)



# Subject 001-008 TRT1 (1 tab/3 days)

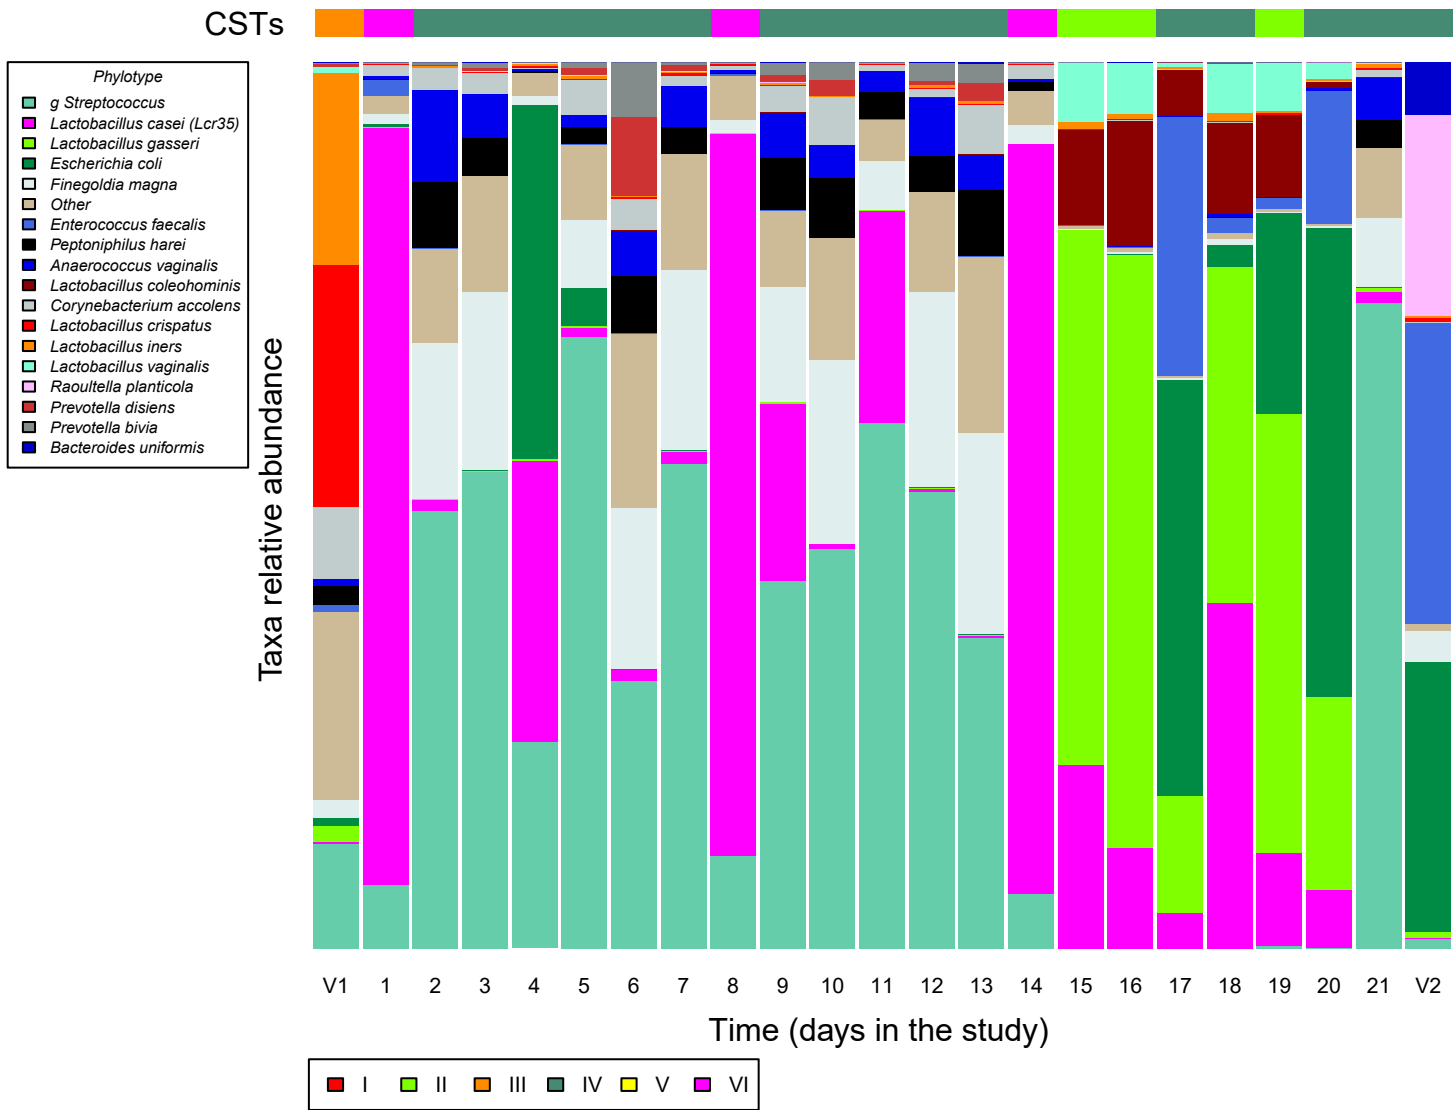



# Subject 001-009 REF (1 caps/day)

CSTs

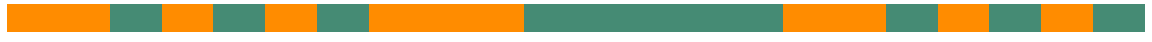

- Phylotype
- *Lactobacillus iners*
  - *Lactobacillus casei* (Lcr35)
  - g *Streptococcus*
  - Other
  - *Escherichia coli*
  - *Atopobium vaginae*
  - *Enterococcus faecalis*
  - *Prevotella bivia*
  - *Lactobacillus vaginalis*
  - *Lactobacillus crispatus*

Taxa relative abundance

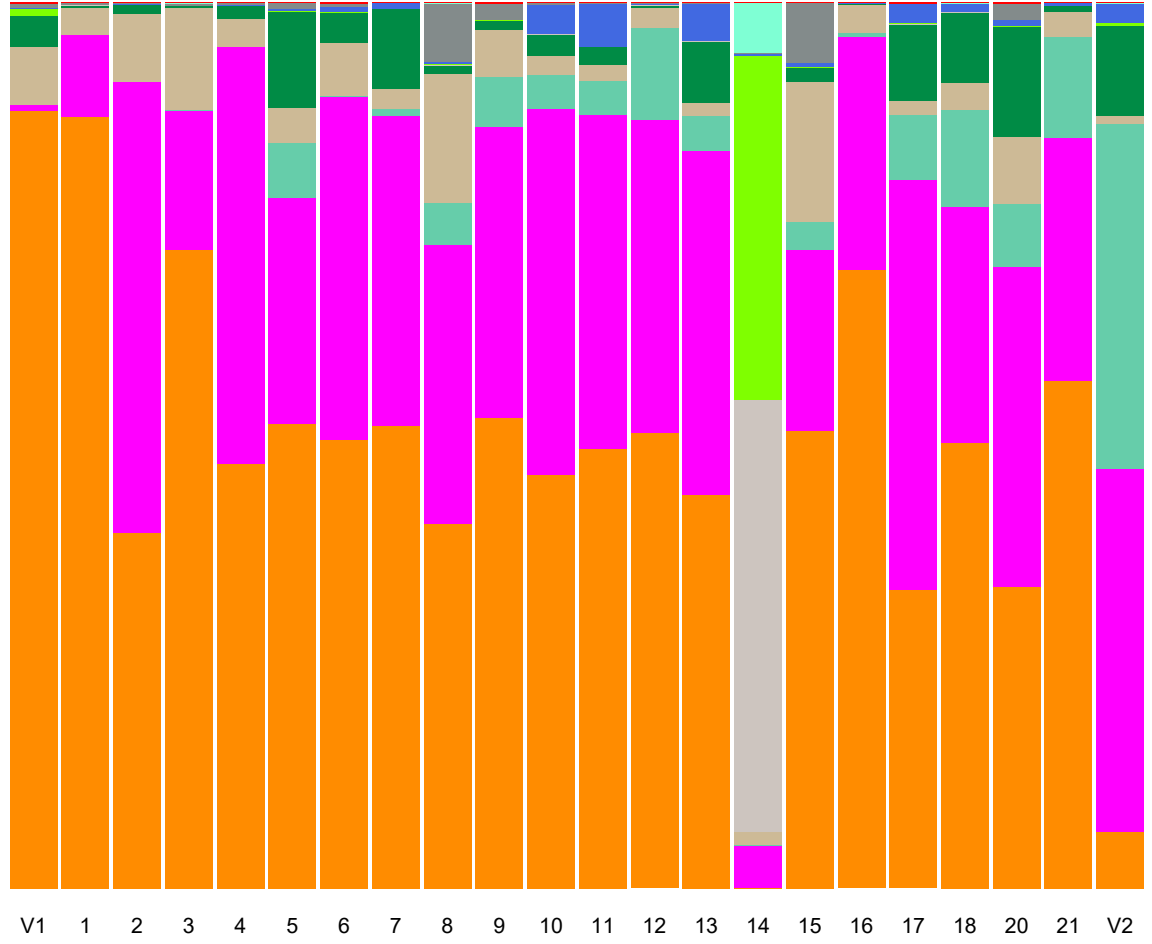

V1 1 2 3 4 5 6 7 8 9 10 11 12 13 14 15 16 17 18 20 21 V2

Time (days in the study)

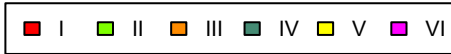

# Subject 001-010 TRT2 (1 tab/4 days)

CSTs

- Phylotype
- *Lactobacillus iners*
  - *Lactobacillus casei (Lcr35)*
  - *Clostridium colicanis*
  - *Raoultella planticola*
  - *g Streptococcus*
  - *g Staphylococcus*
  - Other
  - *Enterococcus faecalis*
  - *Escherichia coli*
  - *Lactobacillus crispatus*
  - *Lactobacillus gasseri*

Taxa relative abundance

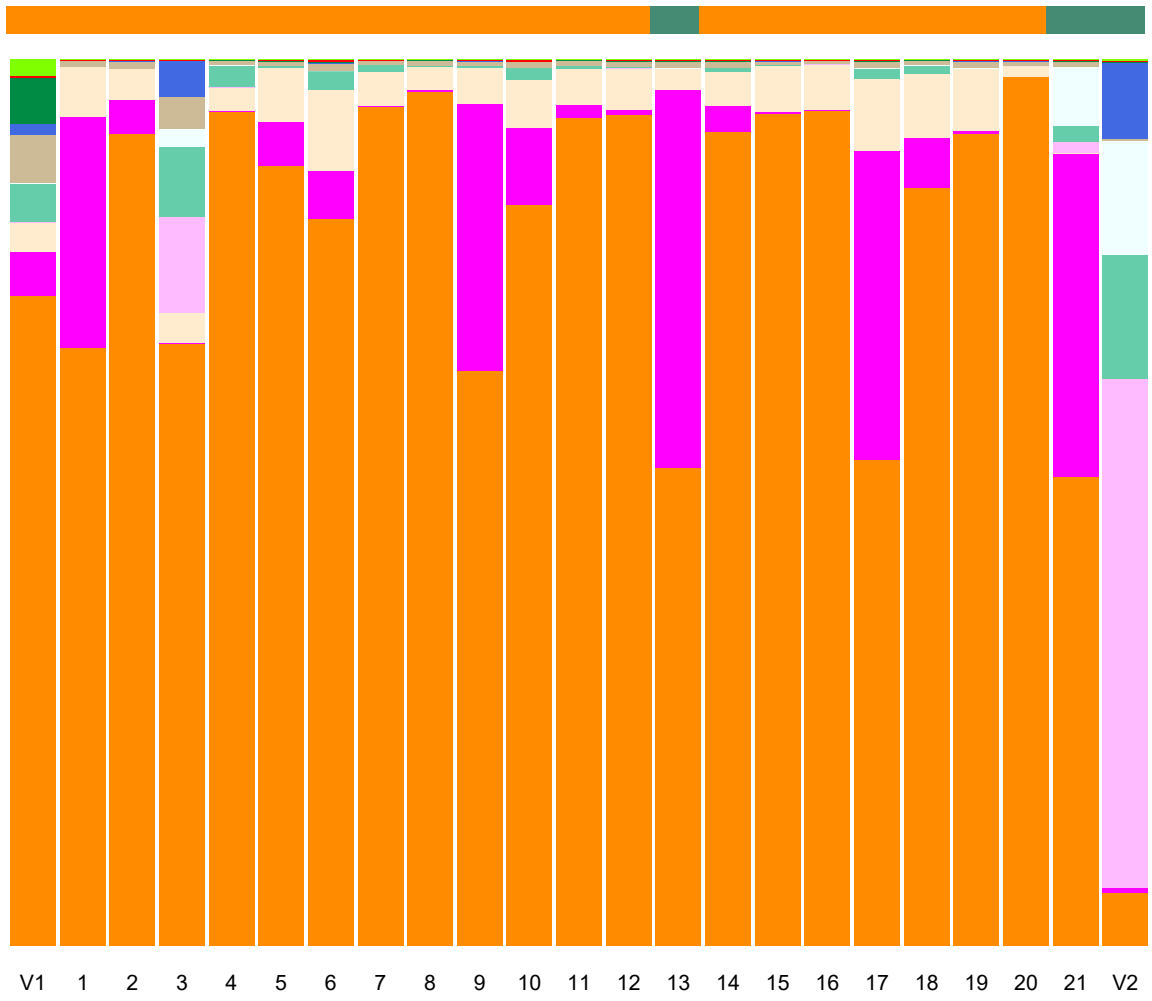

Time (days in the study)

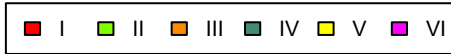

# Subject 001-011 TRT3 (1 tab/5 days)

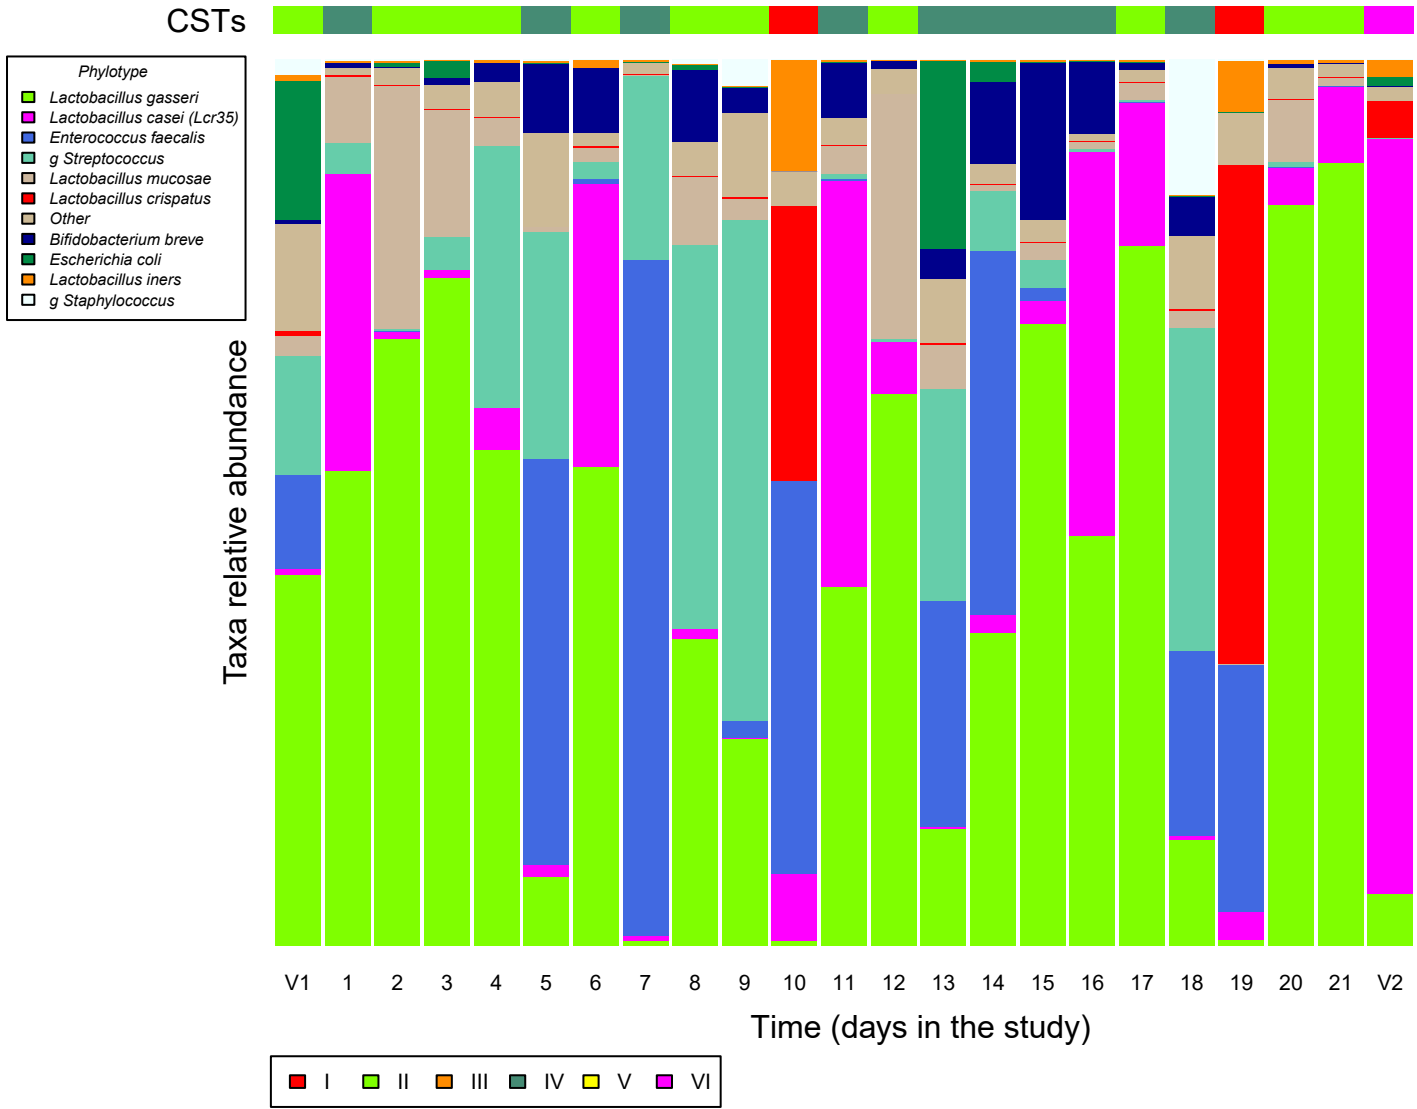



# Subject 001-013 TRT1 (1 tab/3 days)

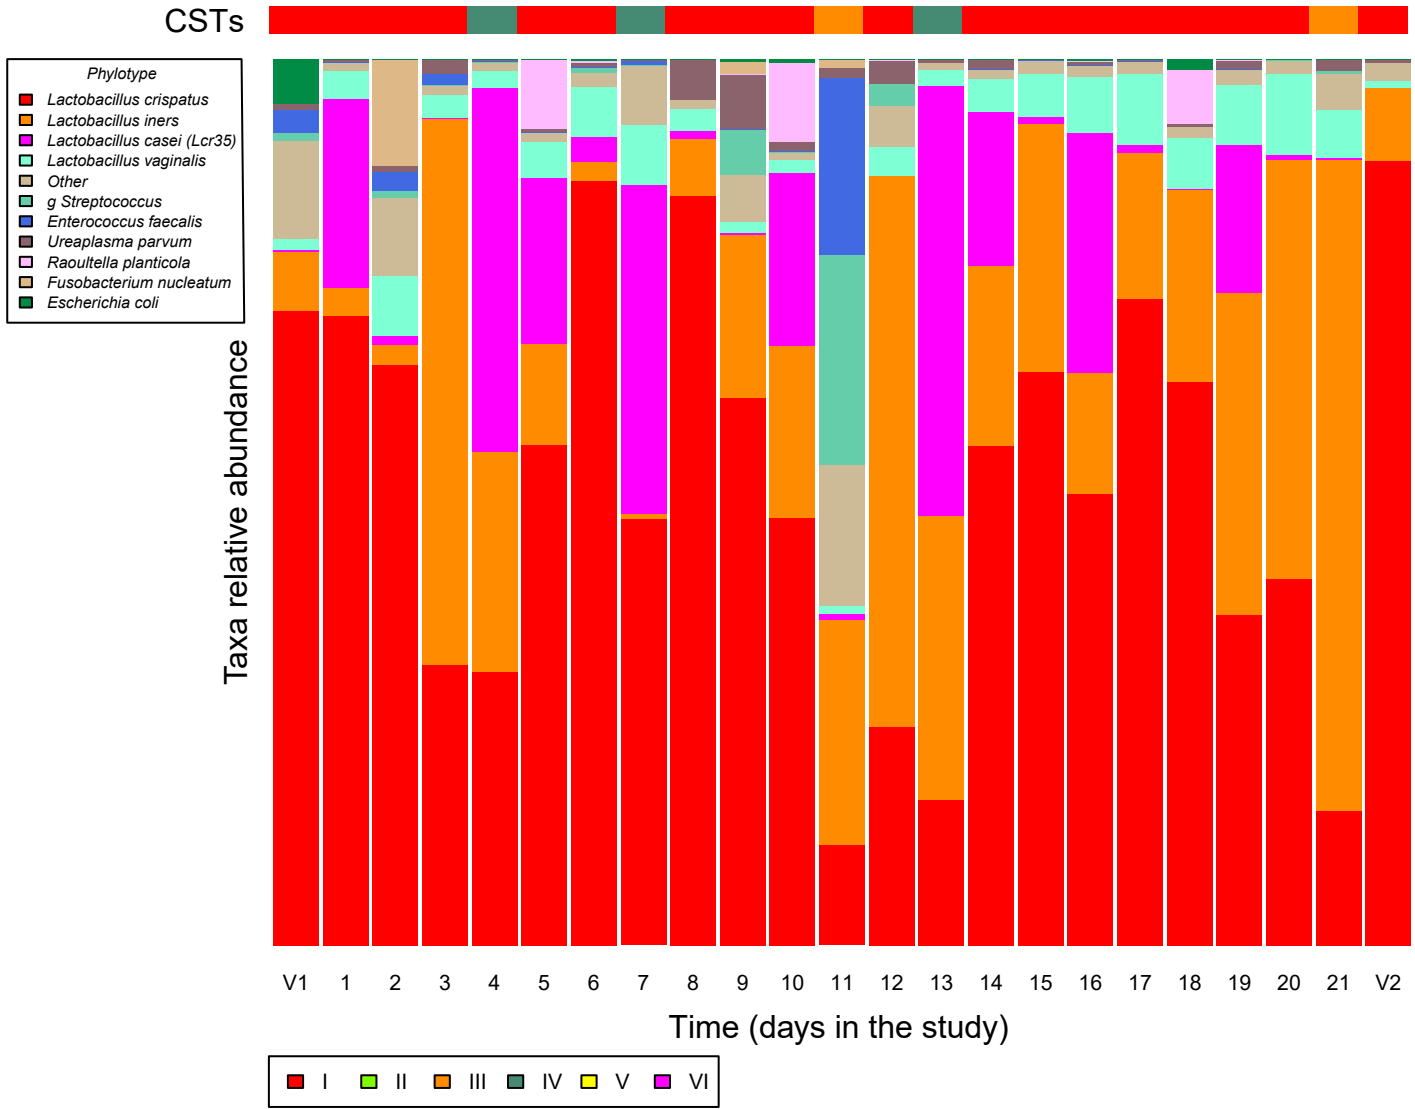

# Subject 001-014 REF (1 caps/day)

CSTs

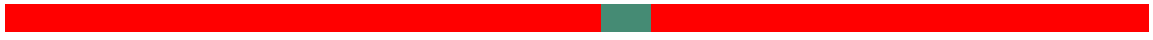

- Phylotype
- *Lactobacillus crispatus*
  - *Lactobacillus gasseri*
  - *Lactobacillus casei (Lcr35)*
  - Other
  - *Lactobacillus iners*
  - *Lactobacillus vaginalis*
  - *Lactobacillus coleohominis*
  - *Ureaplasma parvum*
  - *Prevotella genogroup 2*
  - *Prevotella bivia*
  - *Gardnerella vaginalis*

Taxa relative abundance

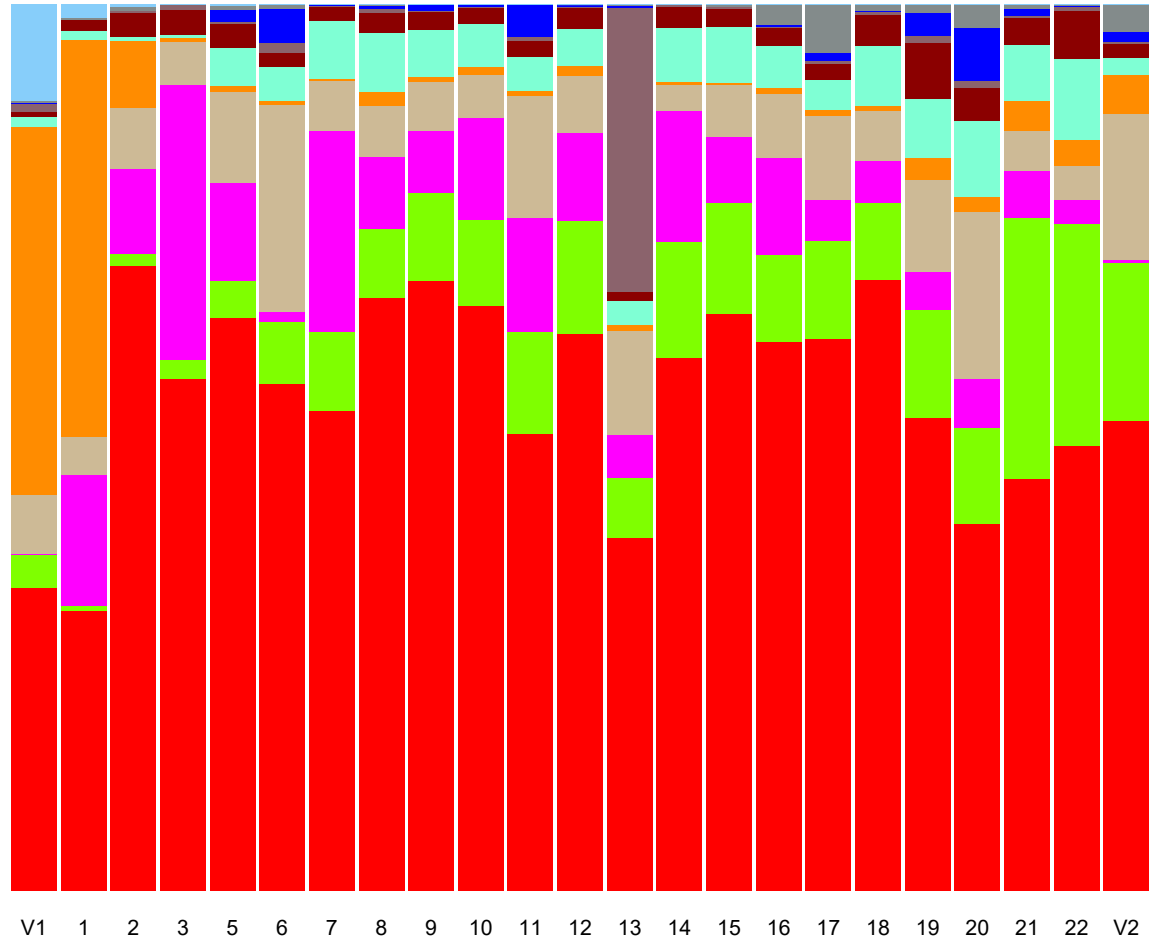

V1 1 2 3 5 6 7 8 9 10 11 12 13 14 15 16 17 18 19 20 21 22 V2

Time (days in the study)

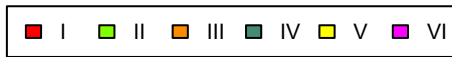

# Subject 001-015 TRT3 (1 tab/5 days)

CSTs

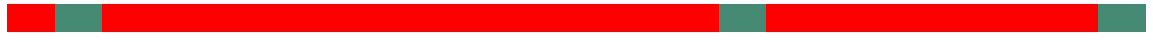

- Phylotype
- *Lactobacillus crispatus*
  - *Lactobacillus casei (Lcr35)*
  - *Gardnerella vaginalis*
  - *Lactobacillus coleohominis*
  - *g Pseudomonas*
  - *Escherichia coli*
  - Other
  - *Lactobacillus gasseri*
  - *Enterococcus faecalis*
  - *Lactobacillus iners*
  - *g Streptococcus*

Taxa relative abundance

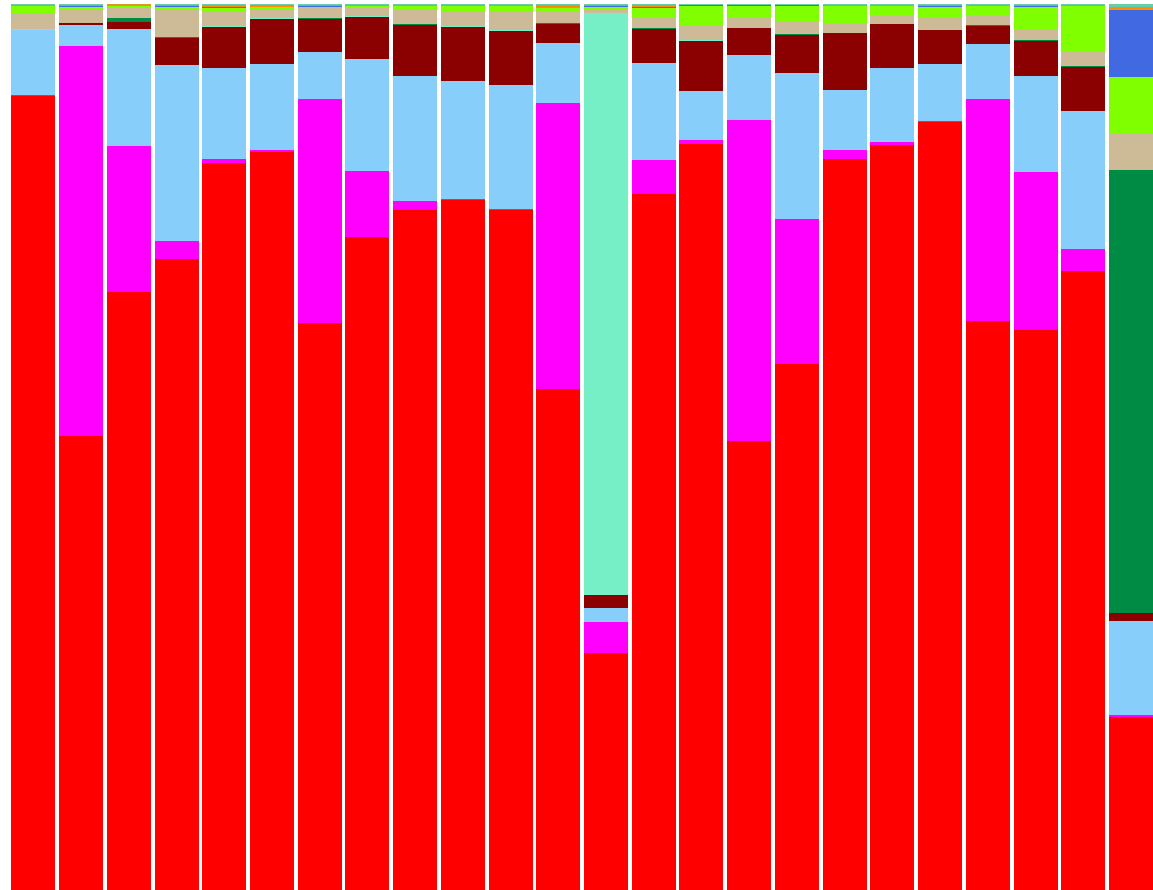

V1 1 2 3 4 5 6 7 8 9 10 11 12 13 14 16 17 18 19 20 21 22 23 V2

Time (days in the study)

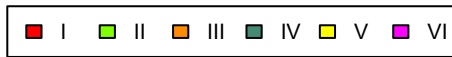

# Subject 001-016 TRT2 (1 tab/4 days)

CSTs

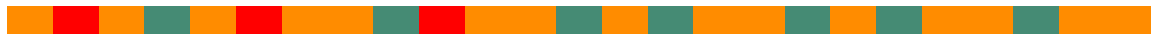

- Phylotype
- *Lactobacillus iners*
  - *Lactobacillus casei (Lcr35)*
  - *Lactobacillus crispatus*
  - *g Pseudomonas*
  - Other
  - *Gardnerella vaginalis*
  - *Enterococcus faecalis*
  - *Ureaplasma parvum*
  - *Lactobacillus gasseri*
  - *Lactobacillus vaginalis*
  - *g Streptococcus*

Taxa relative abundance

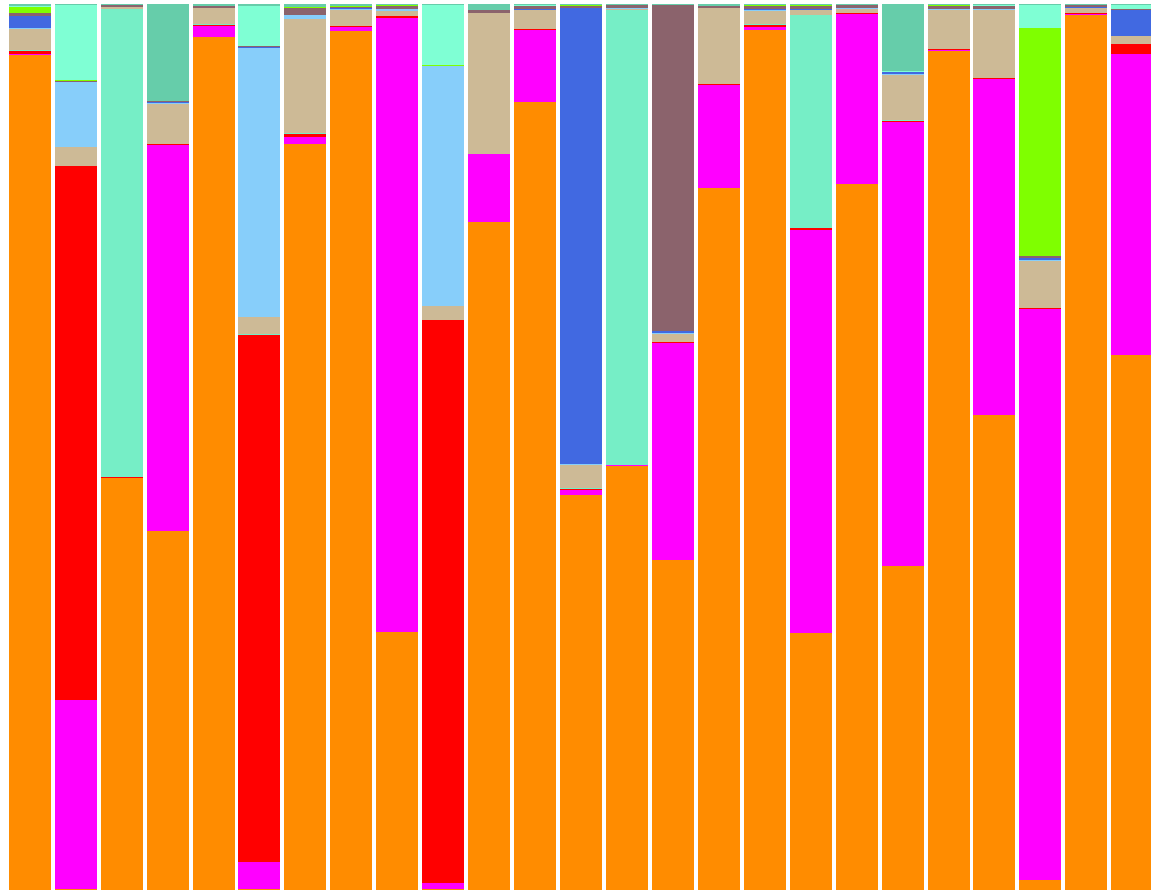

V1 1 2 3 4 5 6 7 8 9 10 11 12 13 14 15 16 17 18 19 20 21 22 23 V2

Time (days in the study)

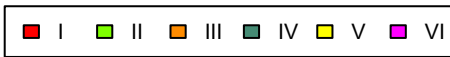



# Subject 001-017 TRT1 (1 tab/3 days)

CSTs

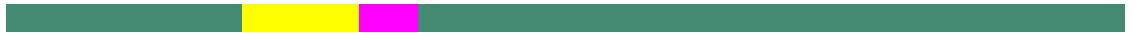

- Phylotype**
- *Lactobacillus jensenii*
  - *Gardnerella vaginalis*
  - *Enterococcus faecalis*
  - *Atopobium vaginae*
  - *Lactobacillus casei (Lcr35)*
  - *Acinetobacter baumannii*
  - *g Streptococcus*
  - *Lactobacillus crispatus*
  - *Escherichia coli*
  - Other
  - *g Staphylococcus*

Taxa relative abundance

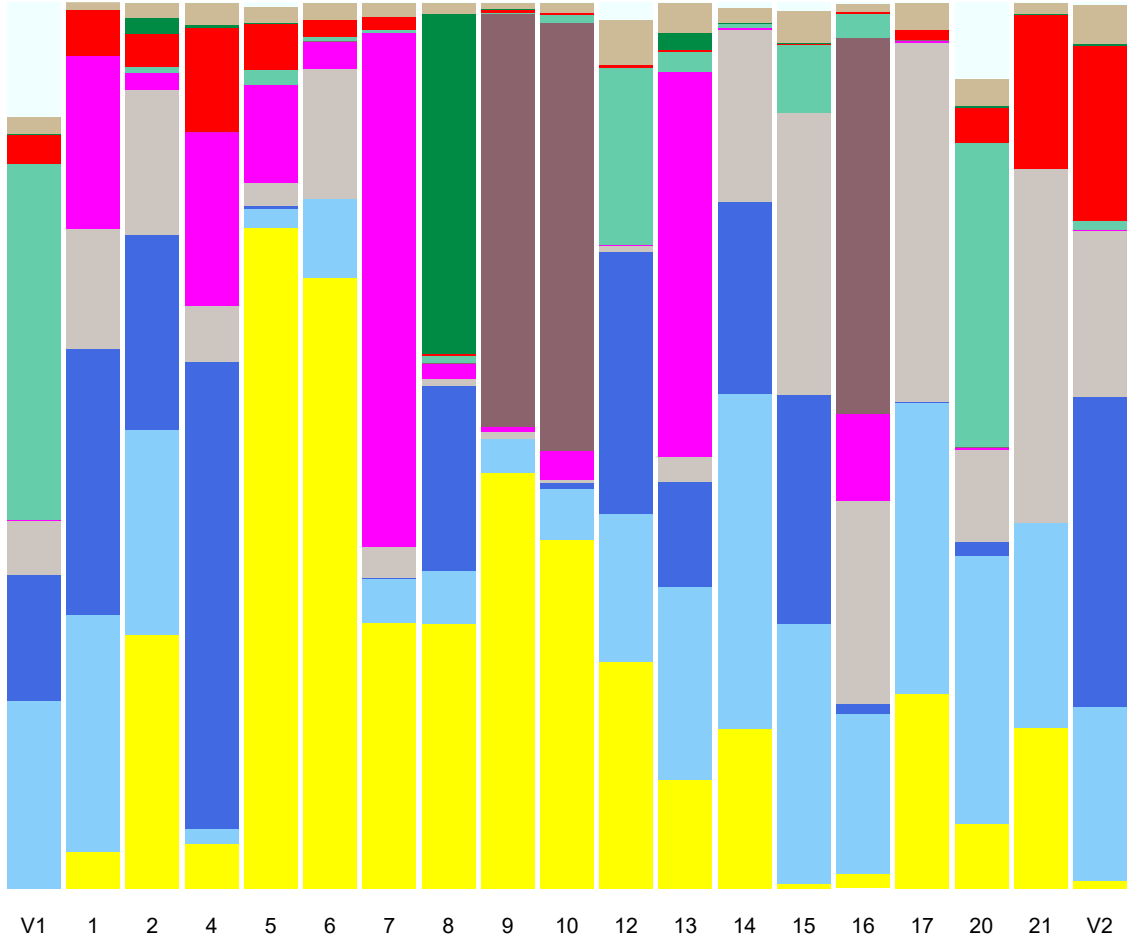

V1 1 2 4 5 6 7 8 9 10 12 13 14 15 16 17 20 21 V2

Time (days in the study)

- I II III IV V VI



# Subject 001-019 TRT2 (1 tab/4 days)

CSTs

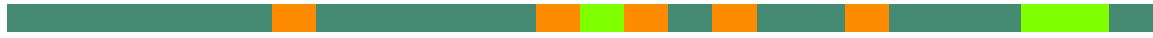

- Phylotype**
- *Lactobacillus iners*
  - *Escherichia coli*
  - *Lactobacillus gasseri*
  - *Lactobacillus casei (Lcr35)*
  - *Enterococcus faecalis*
  - *Lactobacillus vaginalis*
  - *g Streptococcus*
  - *Other*
  - *Lactobacillus crispatus*
  - *Gardnerella vaginalis*
  - *Lactobacillus jensenii*

Taxa relative abundance

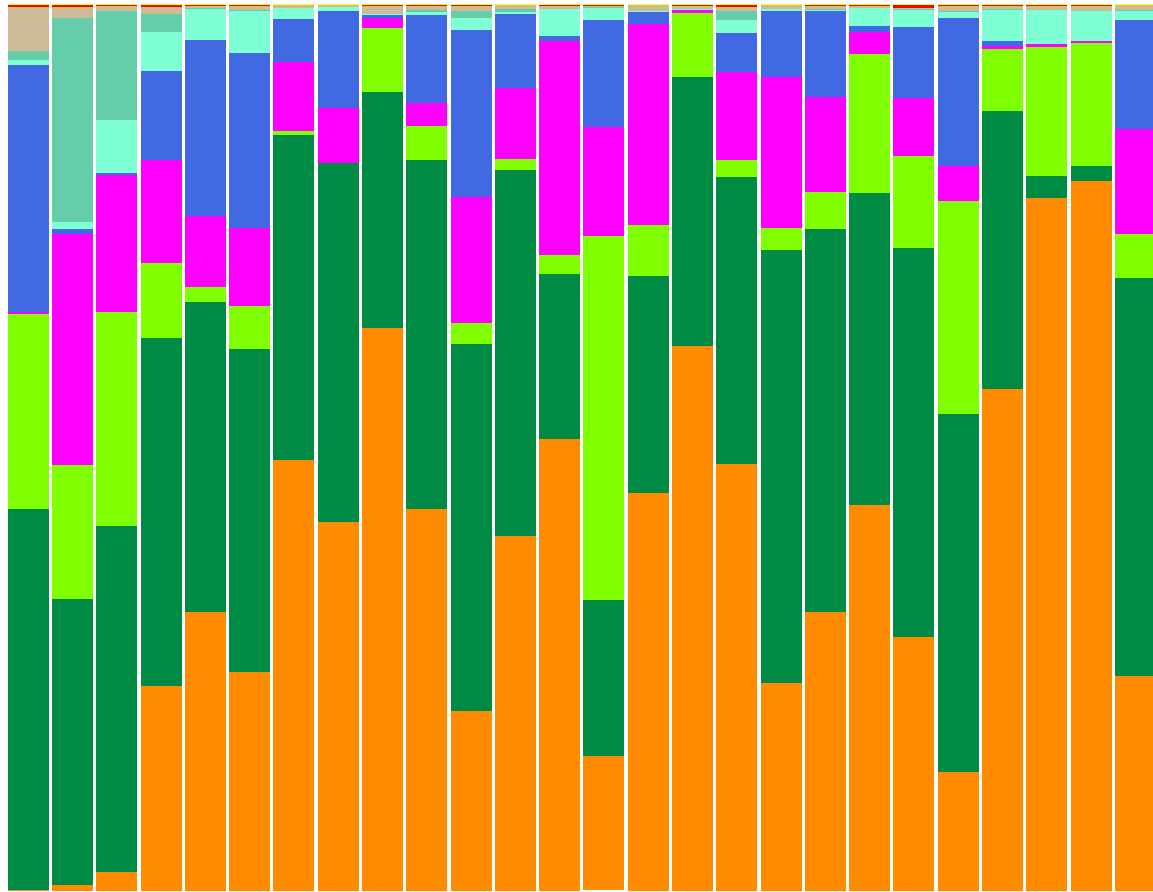

V1 1 2 3 4 5 6 7 8 9 10 11 12 13 14 15 16 17 18 19 20 21 22 24 25 V2

Time (days in the study)

- |   |   |   |    |   |     |   |    |   |   |   |    |
|---|---|---|----|---|-----|---|----|---|---|---|----|
| ■ | I | ■ | II | ■ | III | ■ | IV | ■ | V | ■ | VI |
|---|---|---|----|---|-----|---|----|---|---|---|----|

# Subject 001-020 REF (1 caps/day)

CSTs

- Phylotype
- *Lactobacillus casei* (Lcr35)
  - *Escherichia coli*
  - *g Streptococcus*
  - *Lactobacillus gasseri*
  - *Enterococcus faecalis*
  - *Lactobacillus salivarius*
  - Other
  - *Lactobacillus vaginalis*
  - *g Staphylococcus*
  - *g Pseudomonas*
  - *Bifidobacterium breve*
  - *Raoultella planticola*
  - *Corynebacterium accolens*
  - *Ureaplasma parvum*
  - *Lactobacillus crispatus*

Taxa relative abundance

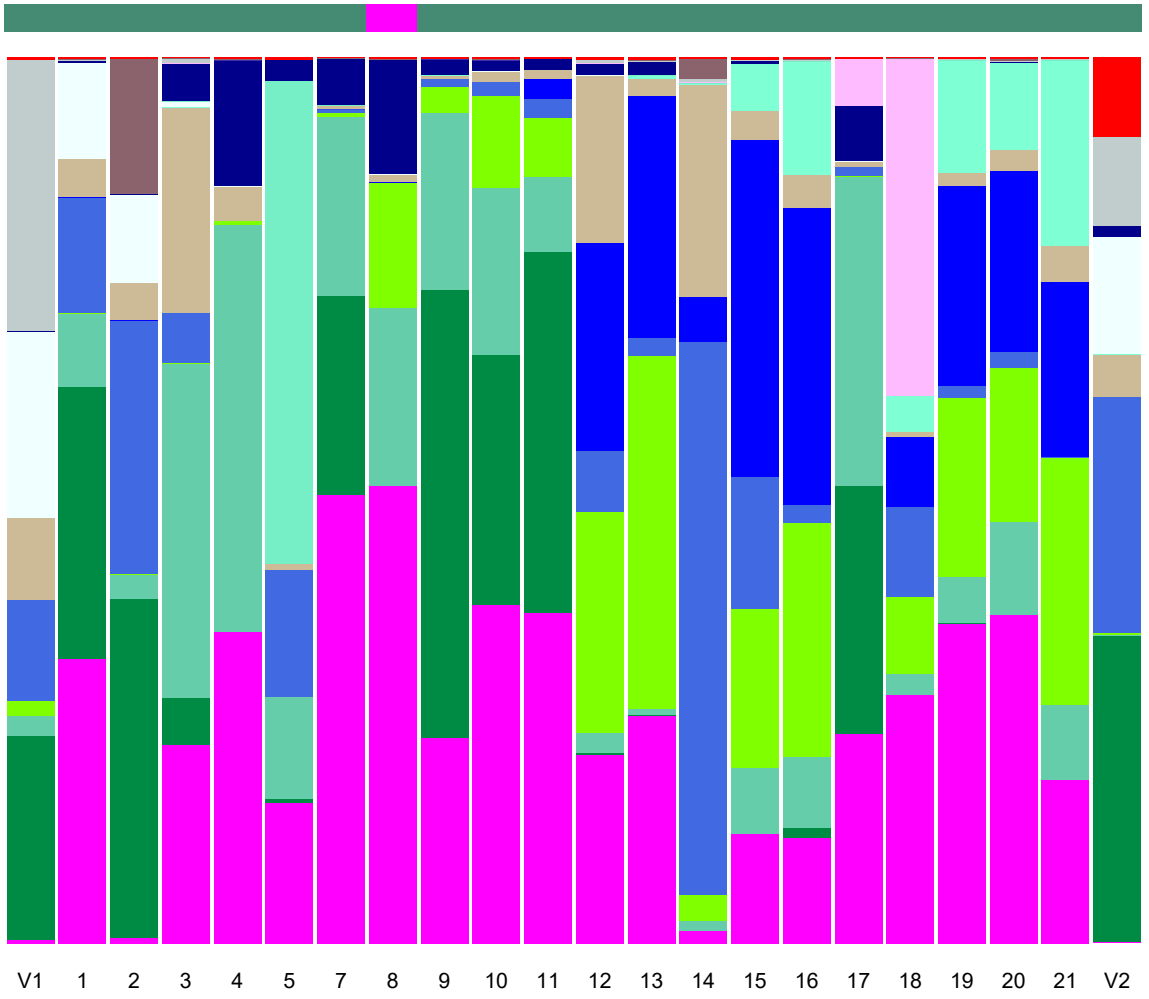

- I
- II
- III
- IV
- V
- VI

# Subject 001-021 TRT 3 (1 tab/5 days)

CSTs

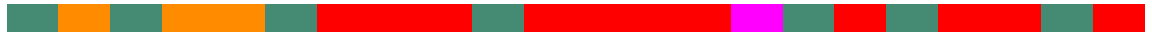

- Phylotype
- *Lactobacillus crispatus*
  - *Lactobacillus jensenii*
  - *Lactobacillus casei (Lcr35)*
  - *Lactobacillus iners*
  - *Escherichia coli*
  - *Enterococcus faecalis*
  - *Raoultella planticola*
  - Other
  - *Lactobacillus vaginalis*
  - g *Pseudomonas*
  - g *Staphylococcus*
  - g *Streptococcus*

Taxa relative abundance

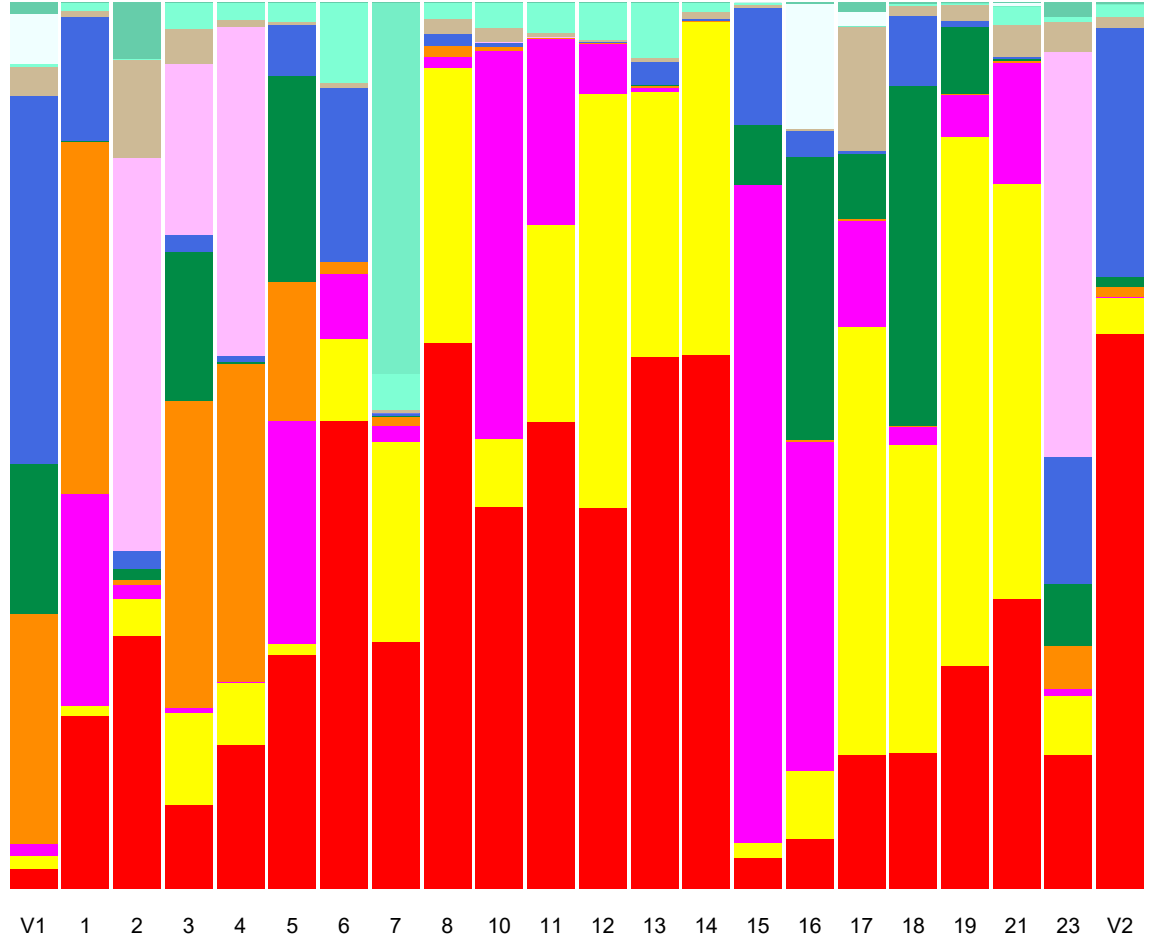

Time (days in the study)

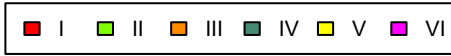

# Subject 001-022 REF (1 caps/day)

CSTs

- Phylotype
- *Lactobacillus crispatus*
  - *g Streptococcus*
  - *Lactobacillus casei (Lcr35)*
  - *Lactobacillus gasseri*
  - *Lactobacillus iners*
  - *Enterococcus faecalis*
  - Other
  - *Escherichia coli*
  - *Corynebacterium accolens*
  - *Finegoldia magna*
  - *g Staphylococcus*
  - *Sneathia sanguinegens*
  - *Lactobacillus coleohominis*
  - *Peptoniphilus harei*
  - *Lactobacillus mucosae*
  - *Anaerococcus tetradius*
  - *Anaerococcus vaginalis*
  - *Gardnerella vaginalis*
  - *Peptoniphilus indolicus*
  - *Alloscardovia omnicolens*

Taxa relative abundance

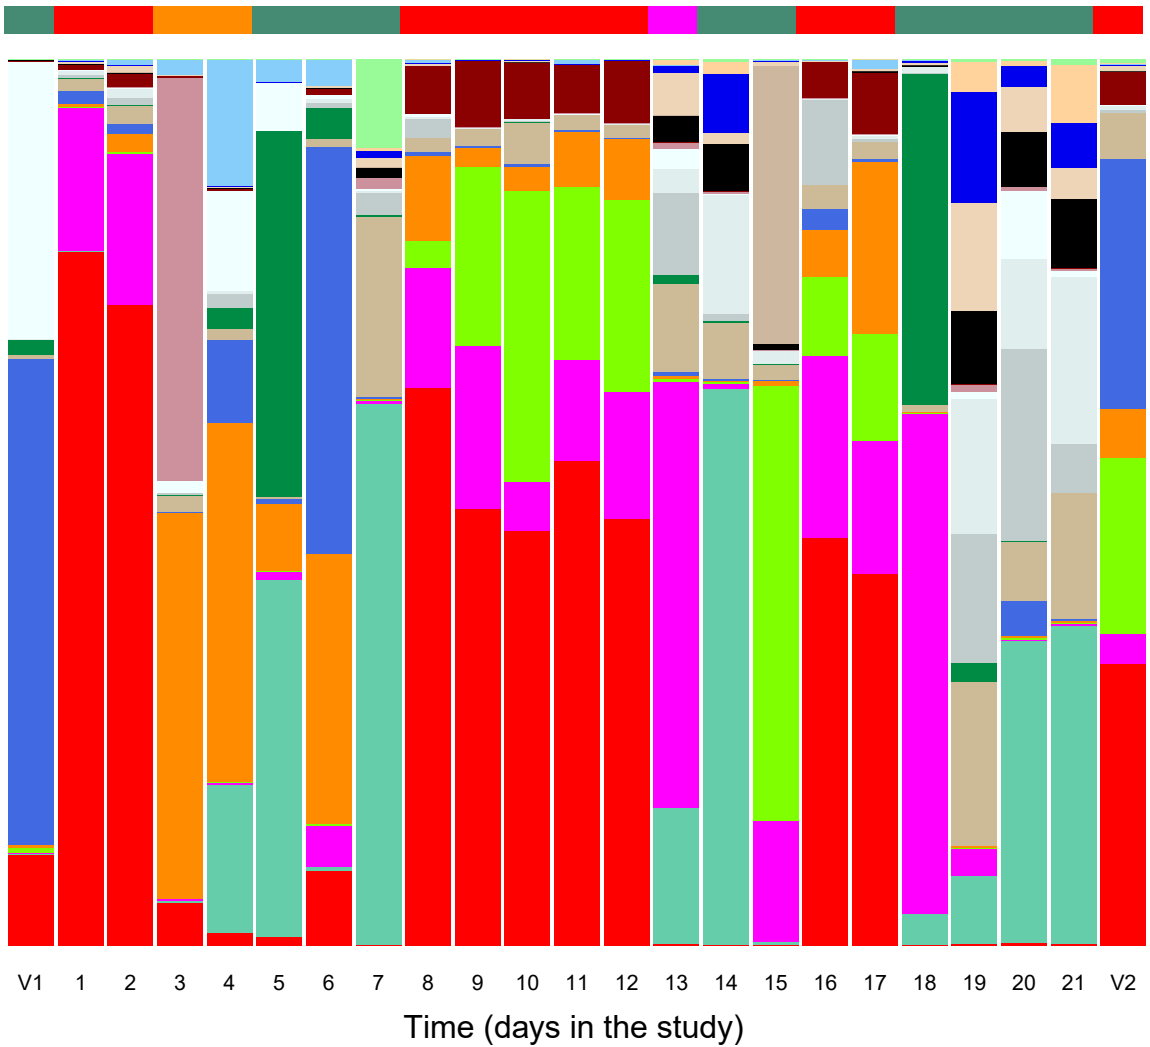

- I
- II
- III
- IV
- V
- VI

# Subject 001-023 TRT2 (1 tab/4 days)

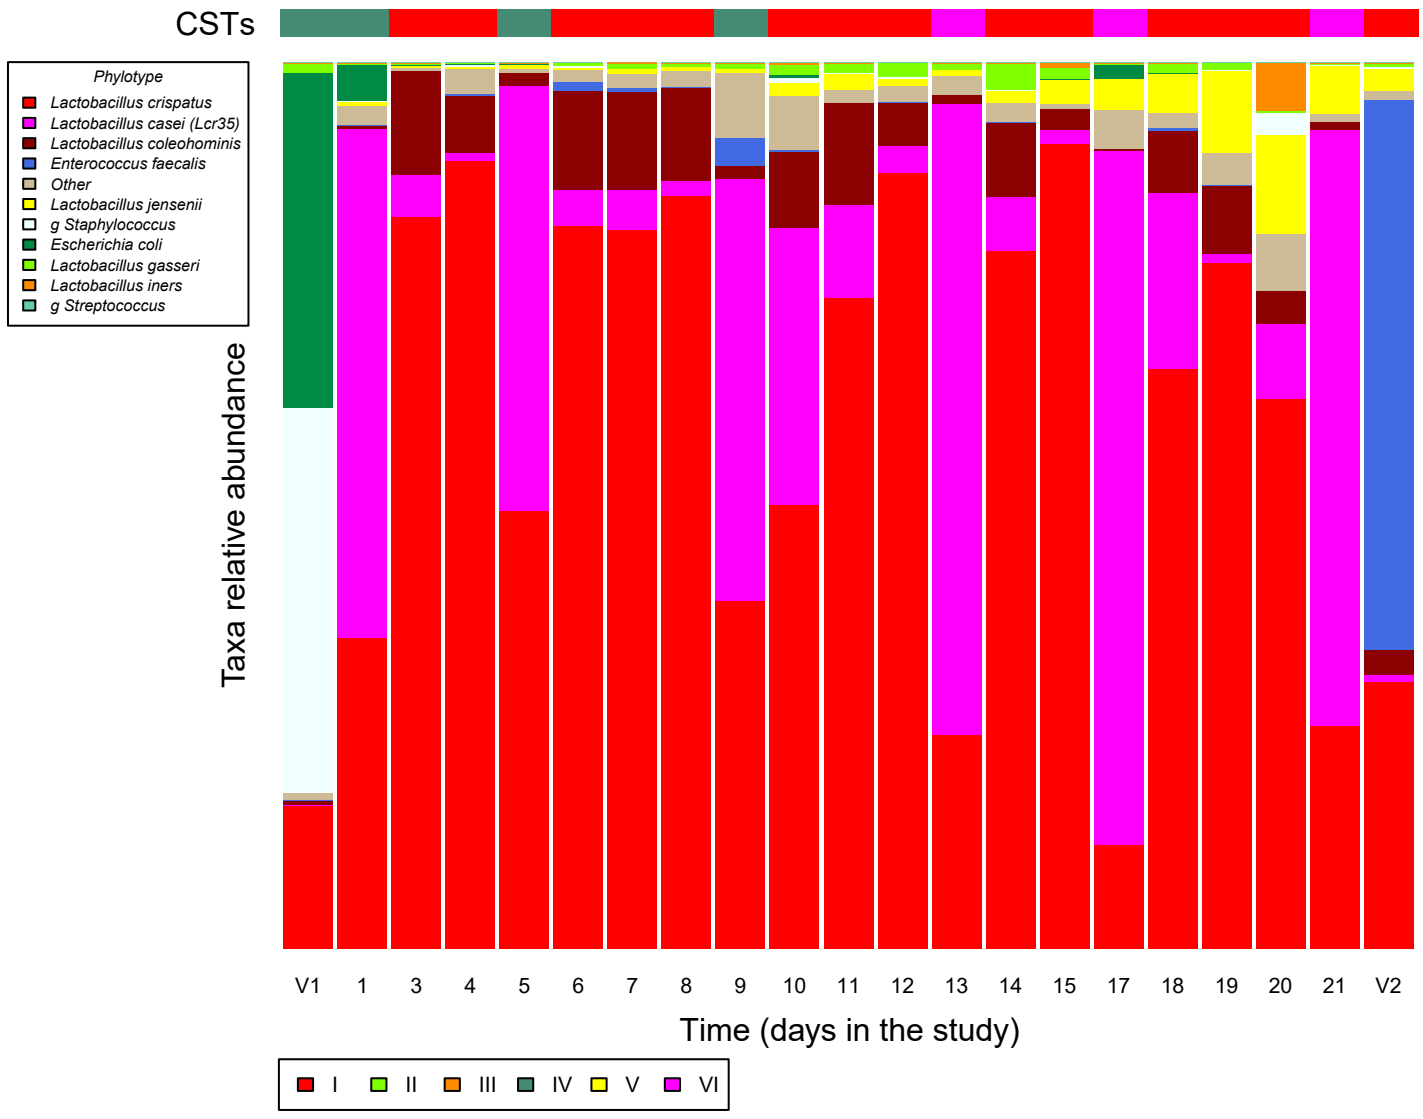

# Subject 002-001 REF (1 caps/day)

CSTs

- Phylotype*
- *Lactobacillus crispatus*
  - *Lactobacillus casei (Lcr35)*
  - *Raoultella planticola*
  - *Other*
  - *Lactobacillus vaginalis*
  - *Escherichia coli*
  - *g Pseudomonas*
  - *g Staphylococcus*
  - *Enterococcus faecalis*
  - *Acinetobacter baumannii*
  - *Agrobacterium tumefaciens*
  - *Ureaplasma parvum*
  - *Lactobacillus gasseri*
  - *Lactobacillus iners*
  - *Peptoniphilus asaccharolyticus*
  - *Prevotella genogroup 6*

Taxa relative abundance

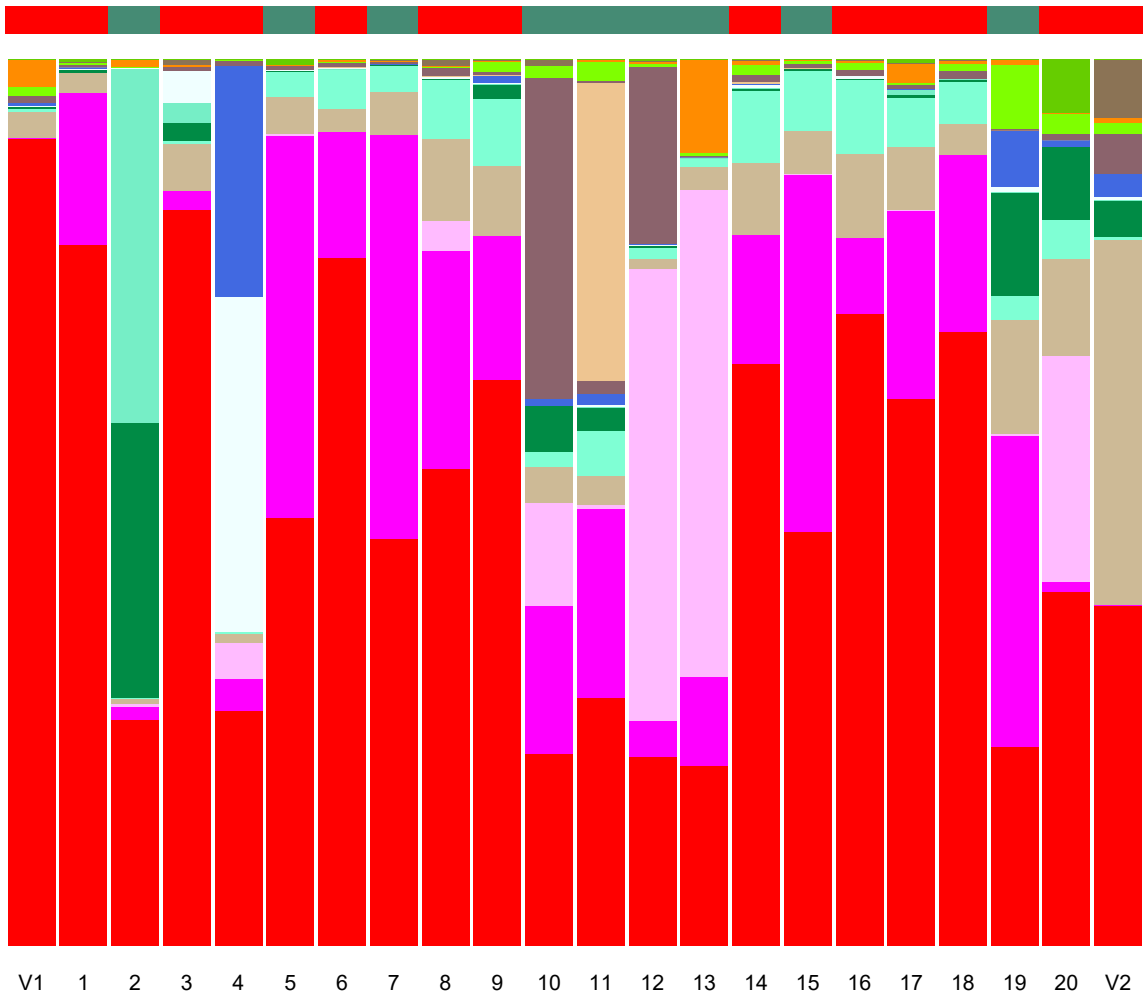

V1 1 2 3 4 5 6 7 8 9 10 11 12 13 14 15 16 17 18 19 20 V2

Time (days in the study)

- 
- 
- 
- 
- 
-



# Subject 002-002 TRT2 (1 tab/4 days)

CSTs

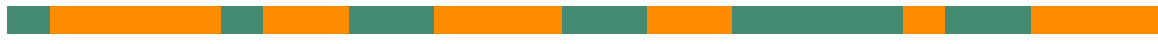

- Phylotype**
- *Lactobacillus iners*
  - *Escherichia coli*
  - *Enterococcus faecalis*
  - *Raoultella planticola*
  - *g Pseudomonas*
  - *Lactobacillus casei (Lcr35)*
  - *g Streptococcus*
  - Other
  - *Acinetobacter baumannii*
  - *Lactobacillus crispatus*
  - *Acinetobacter calcoaceticus*

Taxa relative abundance

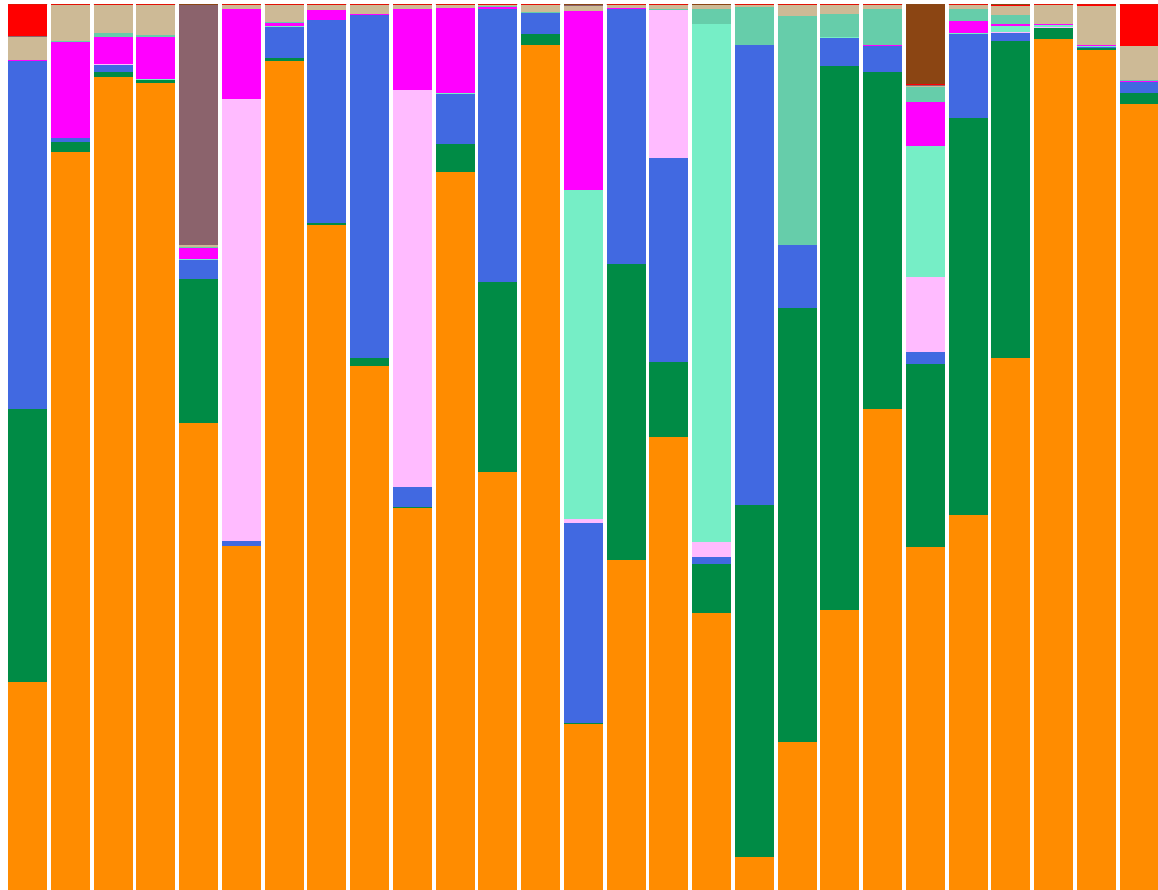

V1 1 2 3 4 5 6 7 8 9 10 11 12 13 14 15 16 17 18 19 20 21 22 23 24 25 V2

Time (days in the study)

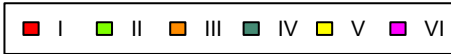

# Subject 002-003 TRT1 (1 tab/3 days)

CSTs

- Phylotype
- *Lactobacillus casei* (Lcr35)
  - *Lactobacillus gasseri*
  - *Lactobacillus vaginalis*
  - *Alloscardovia omnicolens*
  - *Acinetobacter baumannii*
  - *Escherichia coli*
  - *Raoultella planticola*
  - Other
  - *Prevotella bivia*
  - *Enterococcus faecalis*
  - *Ureaplasma parvum*

Taxa relative abundance

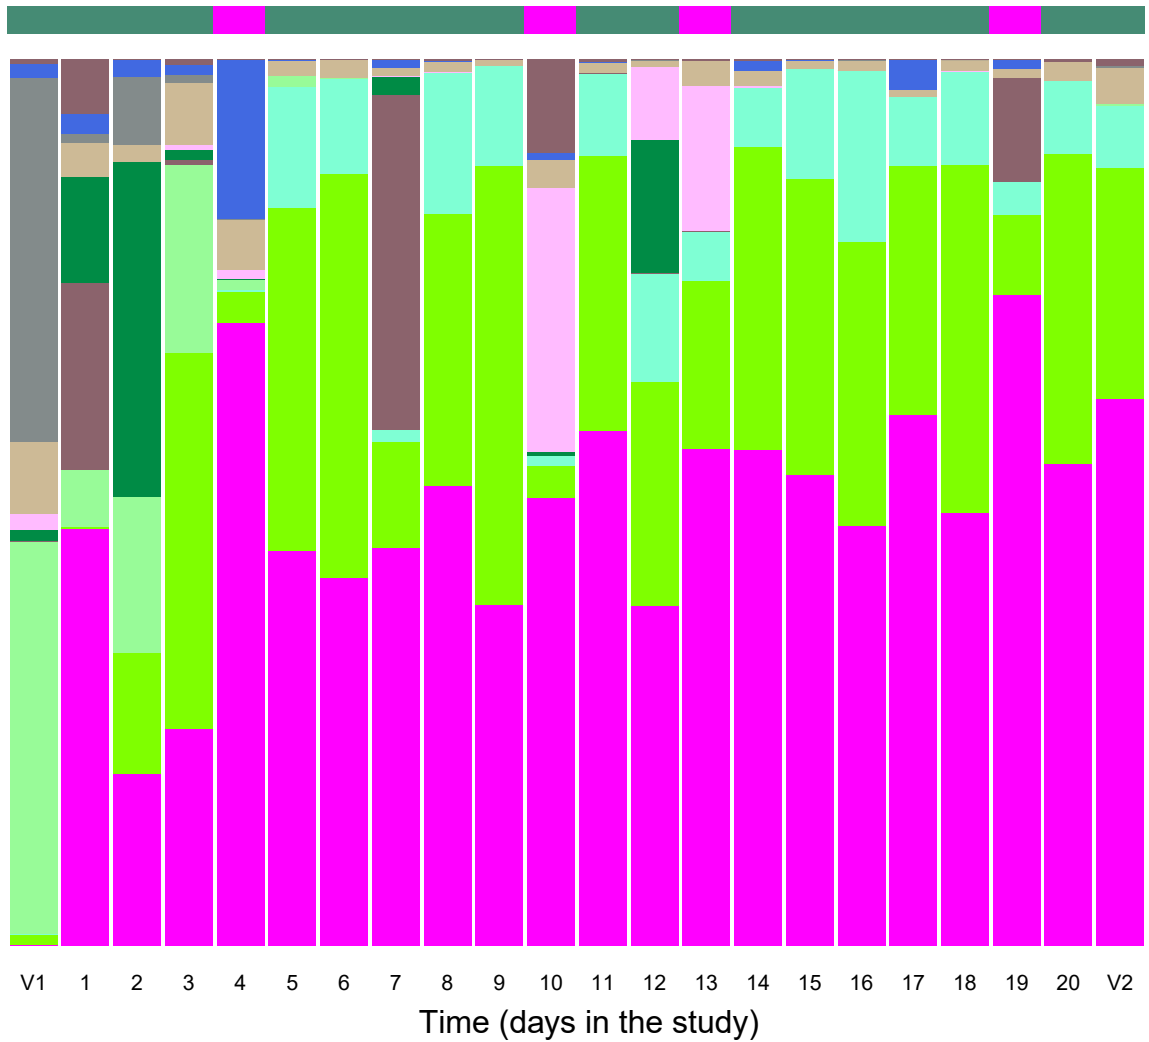

- I
- II
- III
- IV
- V
- VI

# Subject 002-004 TRT3 (1 tab/5 days)

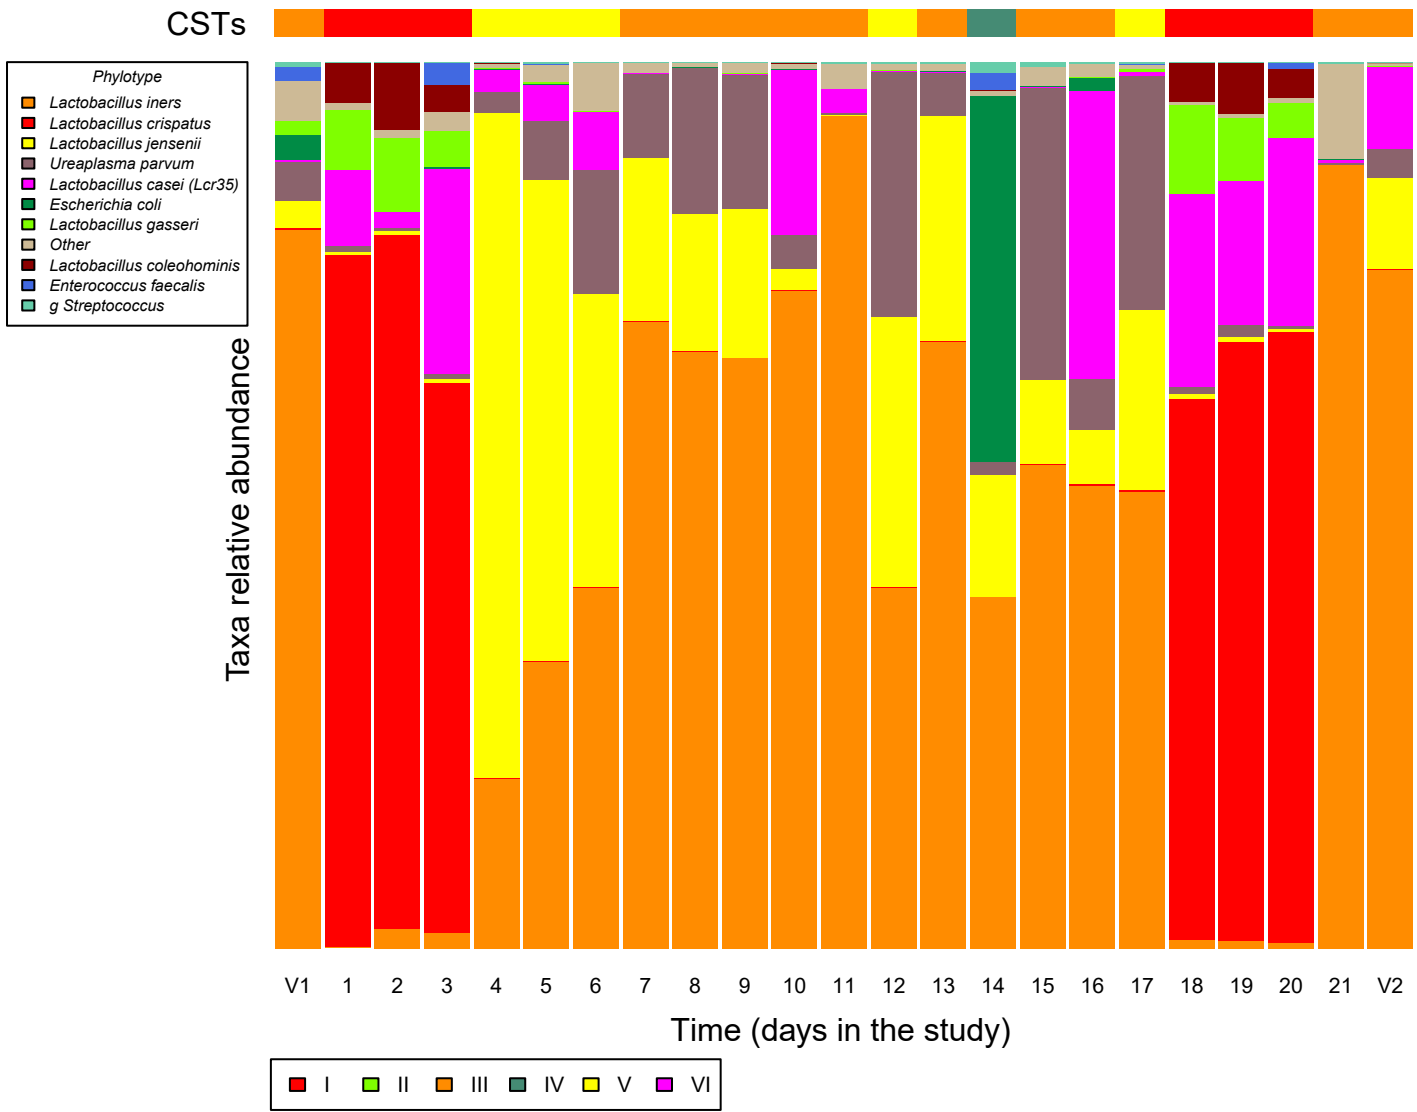



# Subject 002-006 REF (1 caps/day)

CSTs

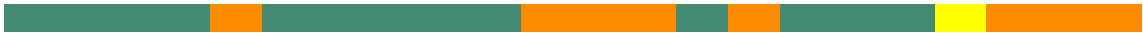

- Phylotype**
- *Lactobacillus iners*
  - *Escherichia coli*
  - *Enterococcus faecalis*
  - *Lactobacillus casei (Lcr35)*
  - Other
  - *Lactobacillus crispatus*
  - *g Pseudomonas*
  - *Lactobacillus vaginalis*
  - *g Streptococcus*
  - *Bacteroides uniformis*
  - *Lactobacillus jensenii*
  - *Corynebacterium accolens*
  - *Prevotella bivia*
  - *Prevotella disiens*
  - *Acinetobacter baumannii*

Taxa relative abundance

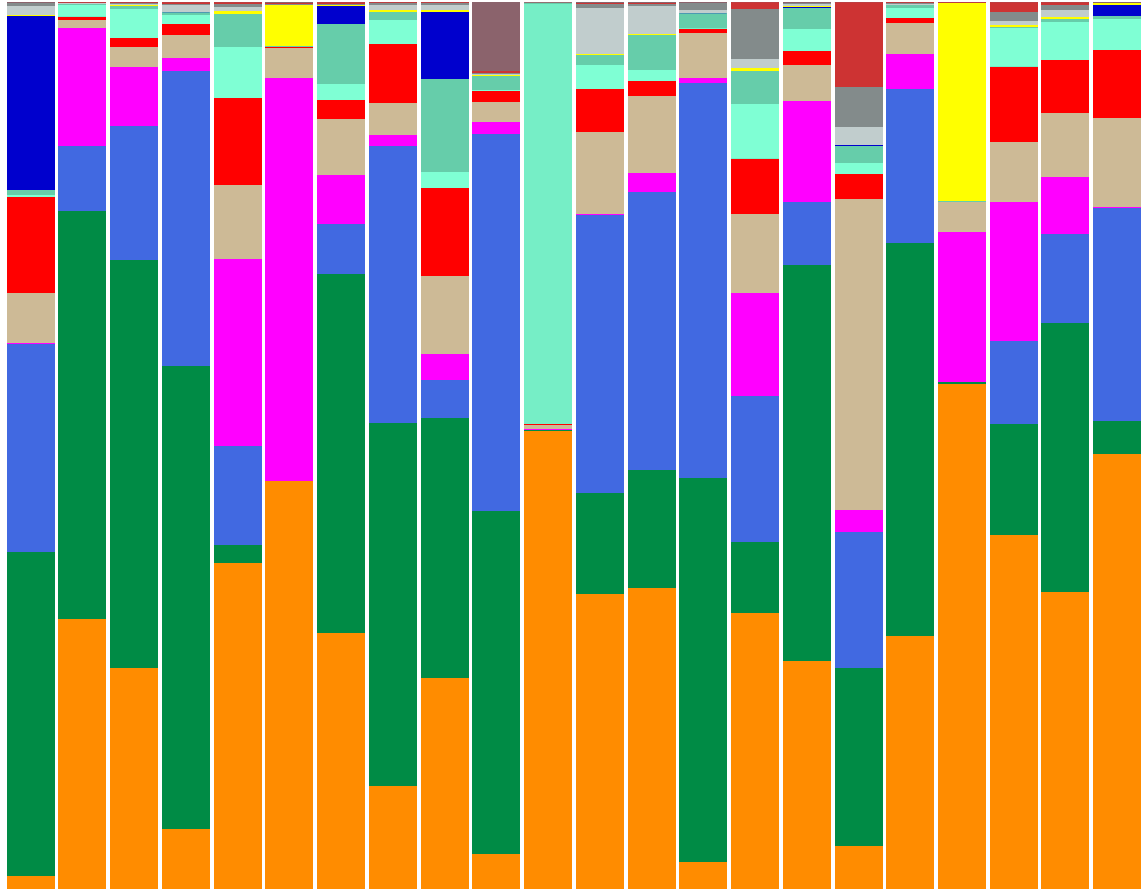

V1 1 2 3 4 5 6 7 8 10 11 12 13 14 15 16 17 18 19 20 21 V2

Time (days in the study)

- I II III IV V VI

# Subject 002-007 TRT3 (1 tab/5 days)

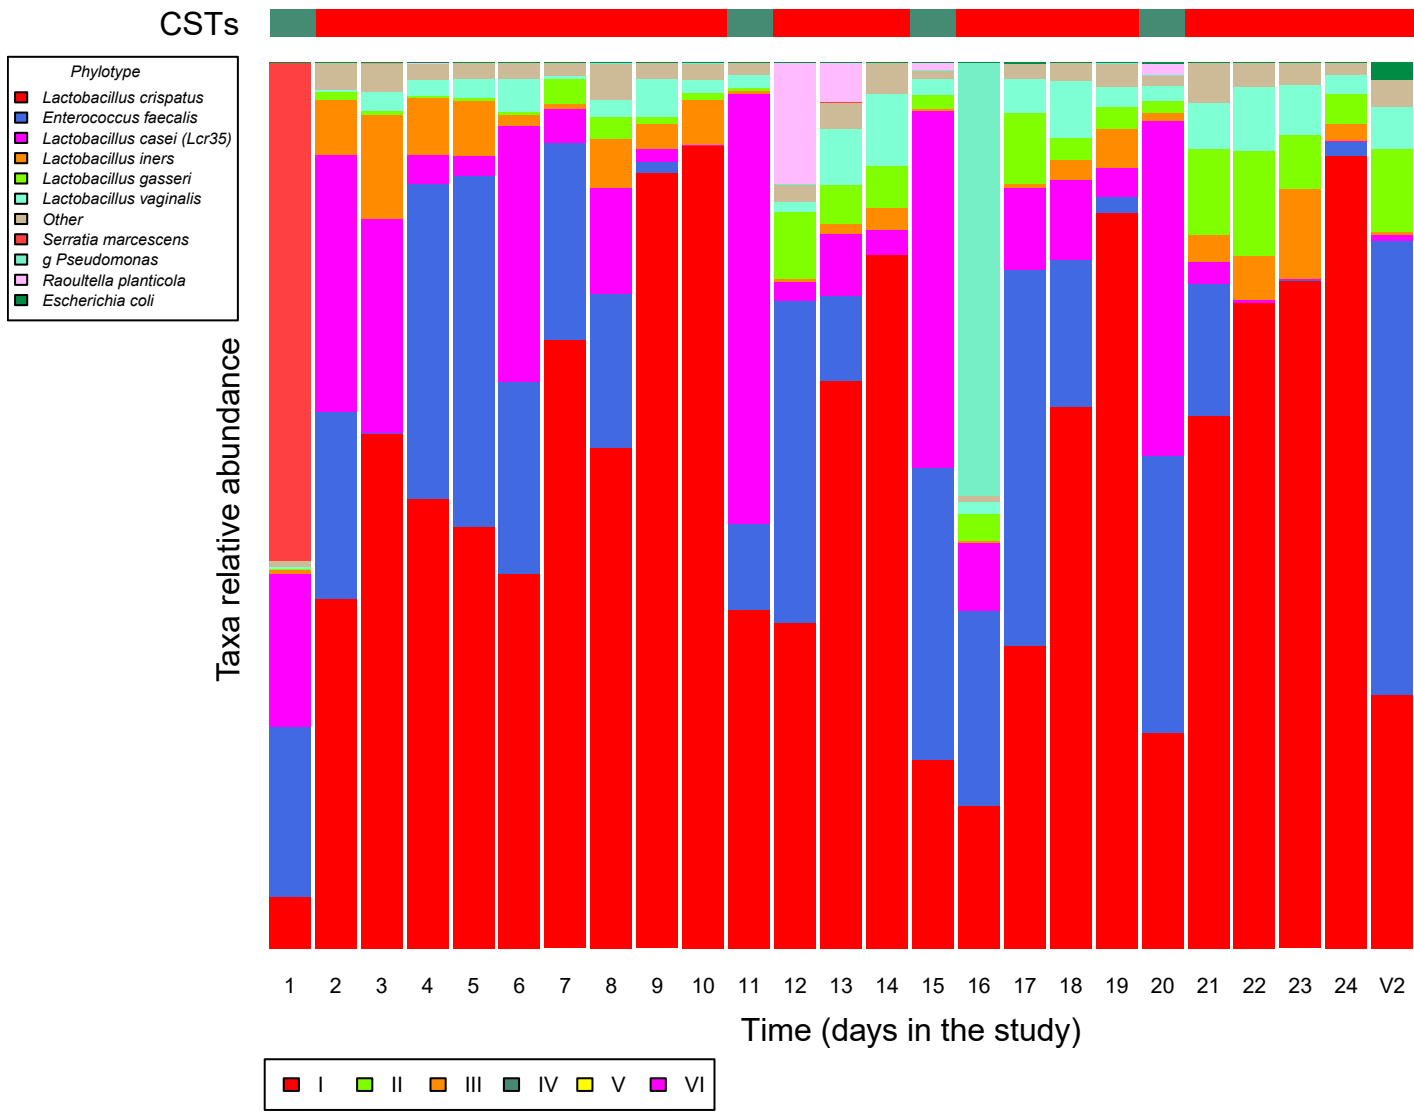

# Subject 002-008 TRT2 (1 tab/4 days)

CSTs

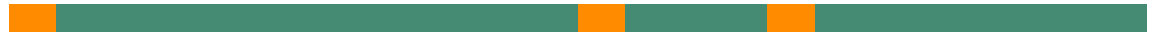

- Phylotype
- *Gardnerella vaginalis*
  - *Lactobacillus casei (Lcr35)*
  - *g Streptococcus*
  - *Aerococcus christensenii*
  - Other
  - *Escherichia coli*
  - *Lactobacillus iners*
  - *Enterococcus faecalis*
  - *Anaerococcus tetradius*
  - *Ureaplasma parvum*
  - *Lactobacillus crispatus*
  - *Prevotella genogroup 3*
  - *Bacteroides uniformis*
  - *Lactobacillus vaginalis*
  - *Sneathia sanguinegens*
  - *Gemella*
  - *Roseburia faecis*
  - *Eggerthella*

Taxa relative abundance

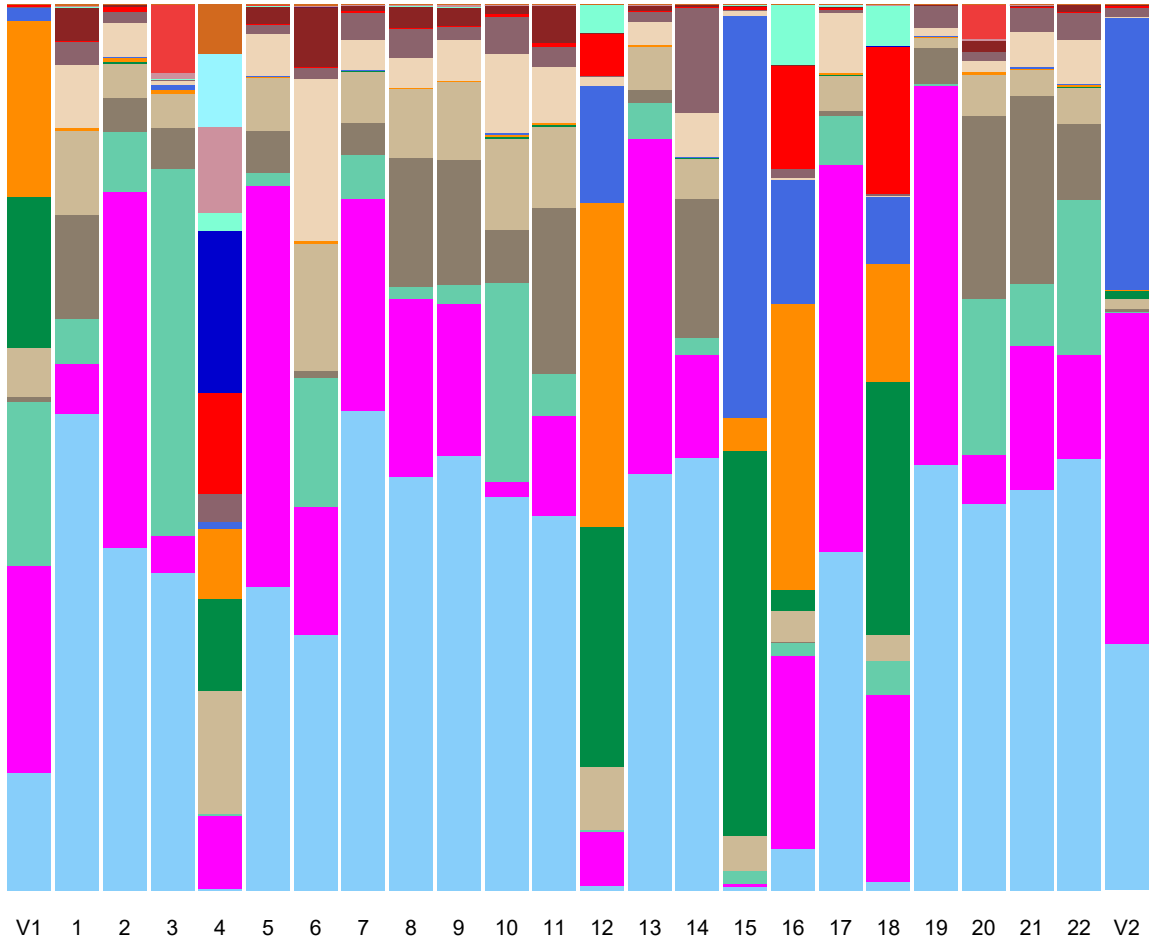

V1 1 2 3 4 5 6 7 8 9 10 11 12 13 14 15 16 17 18 19 20 21 22 V2

Time (days in the study)

- I
- II
- III
- IV
- V
- VI

# Subject 002-009 REF (1 caps/day)

CSTs

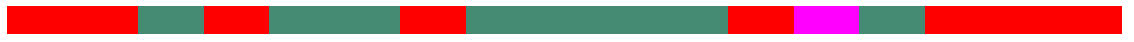

- Phylotype**
- *Lactobacillus crispatus*
  - *Lactobacillus casei (Lcr35)*
  - *Raoultella planticola*
  - *Lactobacillus coleohominis*
  - *g Staphylococcus*
  - *Gardnerella vaginalis*
  - Other
  - *Ureaplasma parvum*
  - *g Pseudomonas*
  - *Lactobacillus gasseri*
  - *Lactobacillus iners*

Taxa relative abundance

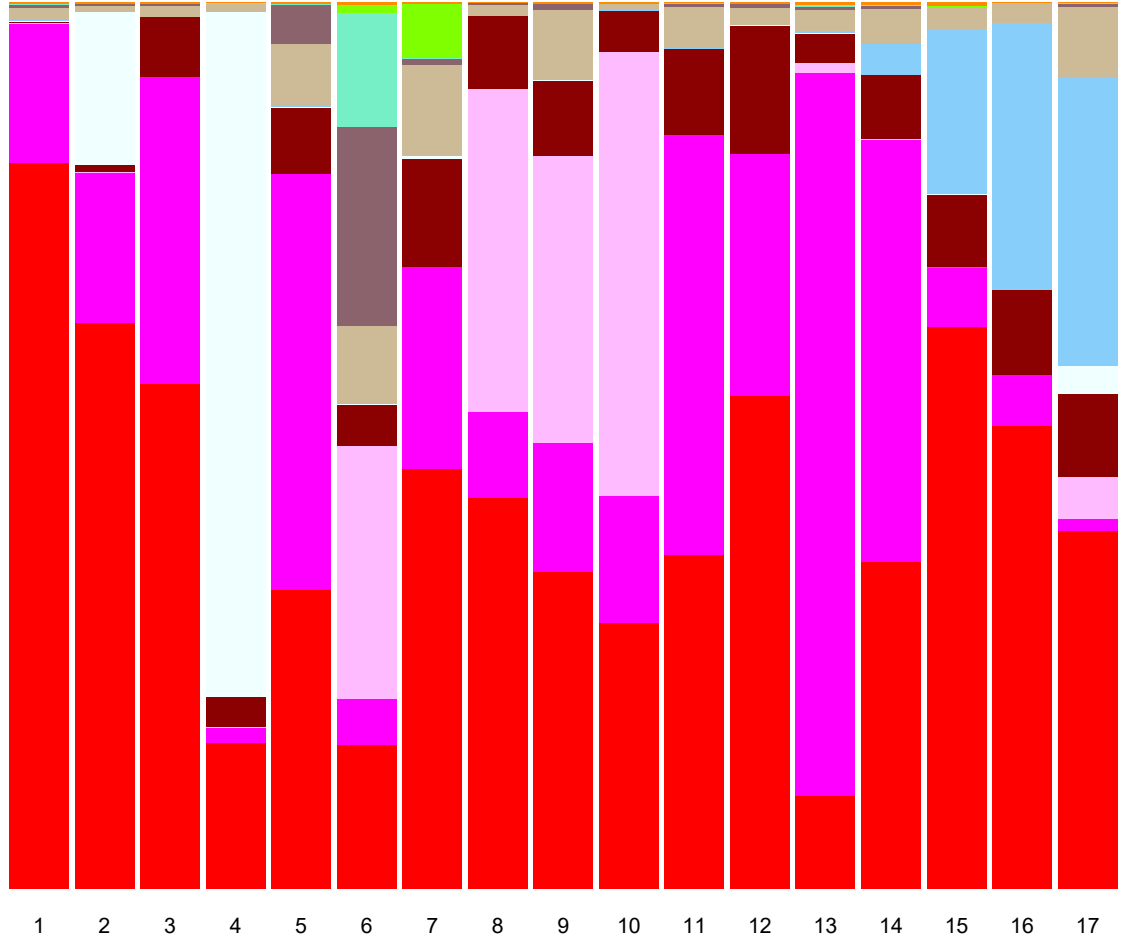

Time (days in the study)

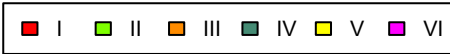



# Subject 002-011 TRT1 (1 tab/3 days)

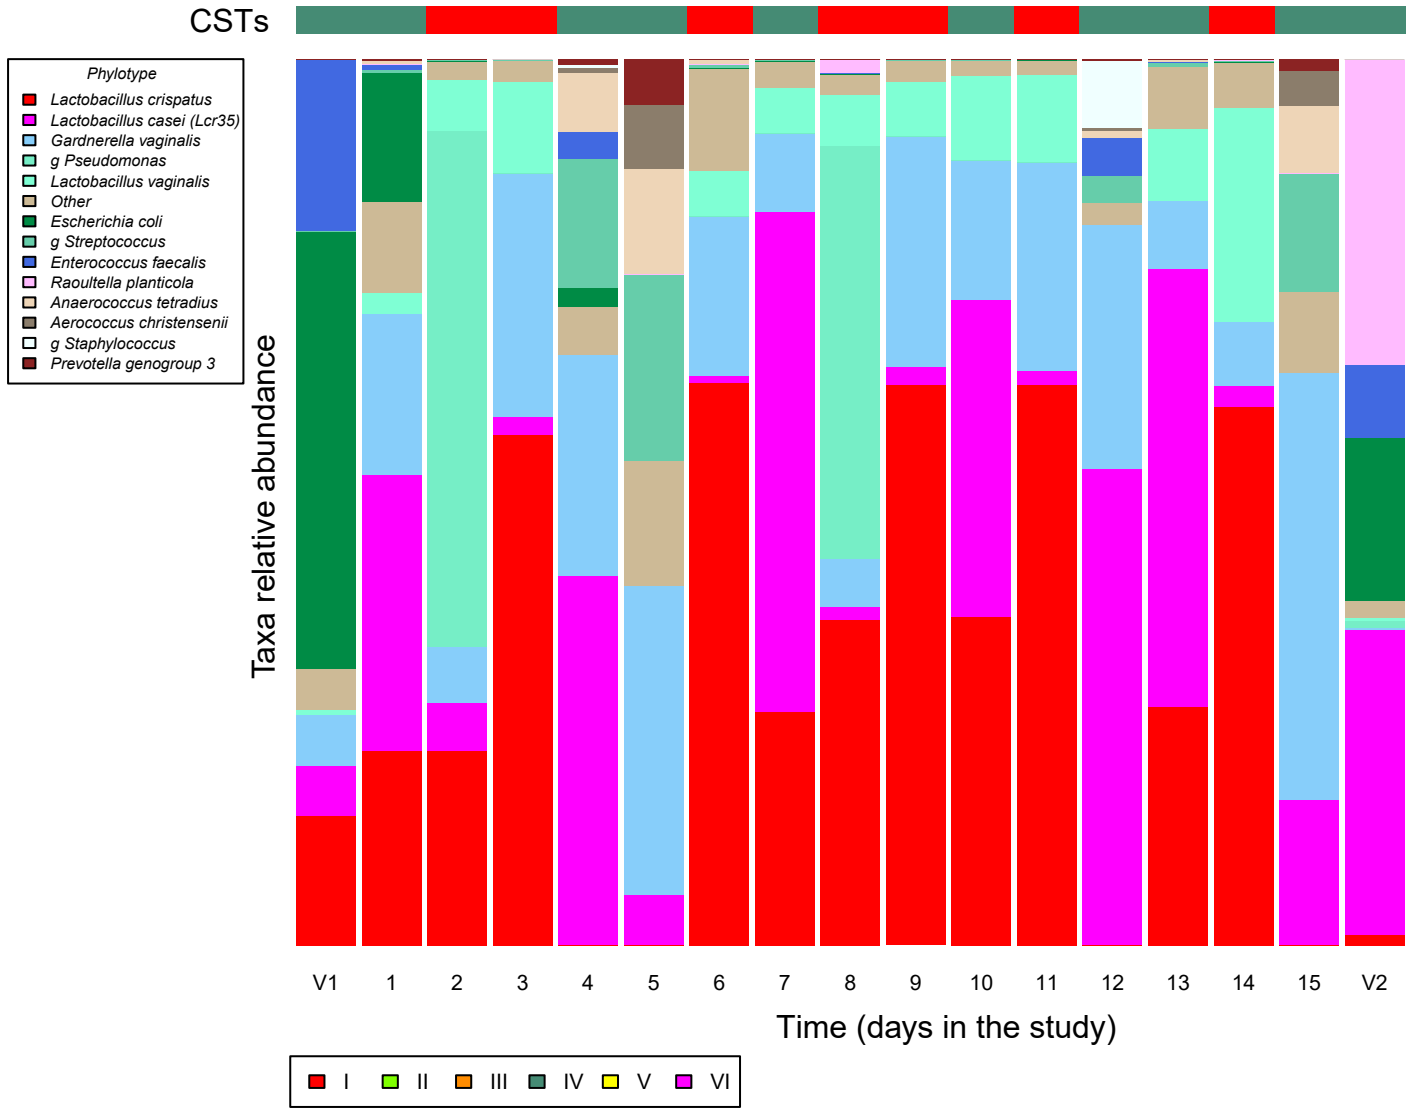

# Subject 002-012 TRT2 (1 tab/4 days)

CSTs

- Phylotype**
- *Enterococcus faecalis*
  - *Escherichia coli*
  - *Lactobacillus gasseri*
  - *Lactobacillus vaginalis*
  - *Lactobacillus casei (Lcr35)*
  - *Bifidobacterium longum*
  - *Sneathia sanguinegens*
  - *Ureaplasma parvum*
  - Other
  - *Alloscardovia omnicolens*
  - *Acinetobacter baumannii*
  - *Lactobacillus iners*
  - *Lactobacillus crispatus*
  - *Prevotella bivia*

Taxa relative abundance

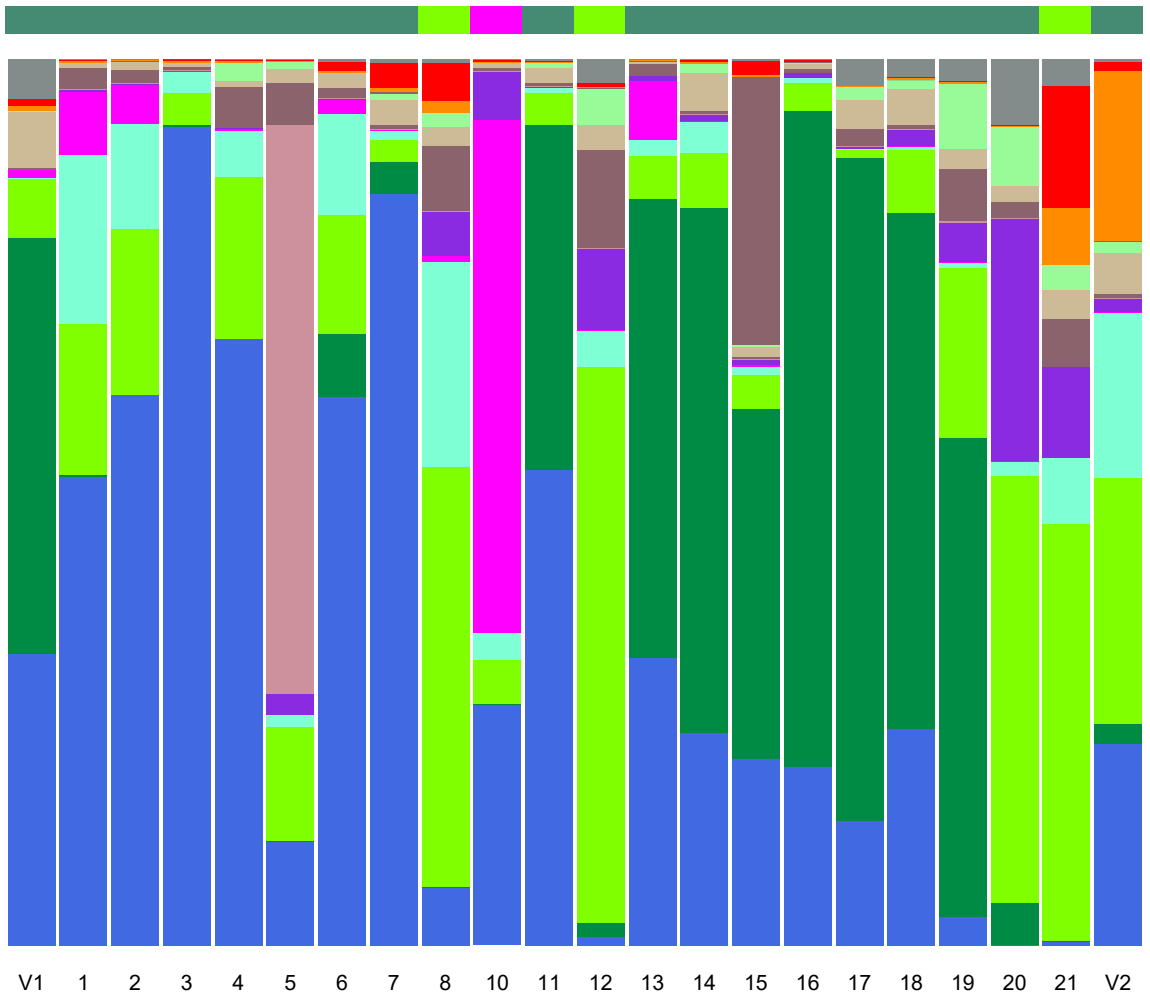

Time (days in the study)

- I II III IV V VI
